# Supplementary material for: NIR Analysis of Intact Grape Berries: Chemical and Physical Properties Prediction Using Multivariate Analysis
Source: PubMed Central journal article supplement (PMC7827816; doi:10.3390/foods10010113), 2021-01-07
Supplement: foods-10-00113-s001.pdf [file foods-10-00113-s001.pdf]

**Table S1.** The loadings for the MSC pretreated spectra samples on the two PC's.

|       | PC1          | PC2           |
|-------|--------------|---------------|
| [1,]  | 2.733938e-02 | -1.660486e-02 |
| [2,]  | 2.725230e-02 | -1.760770e-02 |
| [3,]  | 2.707246e-02 | -1.797356e-02 |
| [4,]  | 2.689235e-02 | -1.817123e-02 |
| [5,]  | 2.627180e-02 | -1.895130e-02 |
| [6,]  | 2.622129e-02 | -1.970949e-02 |
| [7,]  | 2.652210e-02 | -1.927172e-02 |
| [8,]  | 2.695249e-02 | -1.799363e-02 |
| [9,]  | 2.736243e-02 | -1.687749e-02 |
| [10,] | 2.744361e-02 | -1.679531e-02 |
| [11,] | 2.735153e-02 | -1.738192e-02 |
| [12,] | 2.709423e-02 | -1.755663e-02 |
| [13,] | 2.663474e-02 | -1.720353e-02 |
| [14,] | 2.669455e-02 | -1.700145e-02 |
| [15,] | 2.693453e-02 | -1.763469e-02 |
| [16,] | 2.662303e-02 | -1.919826e-02 |
| [17,] | 2.647403e-02 | -2.002844e-02 |
| [18,] | 2.693032e-02 | -1.933045e-02 |
| [19,] | 2.678360e-02 | -1.861158e-02 |
| [20,] | 2.650316e-02 | -1.854426e-02 |
| [21,] | 2.646659e-02 | -1.818879e-02 |
| [22,] | 2.678954e-02 | -1.809783e-02 |
| [23,] | 2.698792e-02 | -1.796613e-02 |
| [24,] | 2.692982e-02 | -1.783806e-02 |
| [25,] | 2.666944e-02 | -1.816960e-02 |
| [26,] | 2.629518e-02 | -1.886002e-02 |
| [27,] | 2.611801e-02 | -1.977133e-02 |
| [28,] | 2.595904e-02 | -2.020701e-02 |
| [29,] | 2.609096e-02 | -2.009795e-02 |
| [30,] | 2.671486e-02 | -1.917812e-02 |
| [31,] | 2.757213e-02 | -1.736981e-02 |
| [32,] | 2.791214e-02 | -1.616125e-02 |
| [33,] | 2.756471e-02 | -1.655360e-02 |
| [34,] | 2.713104e-02 | -1.763736e-02 |
| [35,] | 2.655236e-02 | -1.855797e-02 |
| [36,] | 2.614701e-02 | -1.926719e-02 |
| [37,] | 2.647648e-02 | -1.907429e-02 |
| [38,] | 2.716412e-02 | -1.787578e-02 |
| [39,] | 2.735811e-02 | -1.667017e-02 |
| [40,] | 2.730435e-02 | -1.601982e-02 |

---

[41,] 2.727794e-02 -1.583532e-02  
[42,] 2.678397e-02 -1.669296e-02  
[43,] 2.620833e-02 -1.839691e-02  
[44,] 2.604669e-02 -1.931798e-02  
[45,] 2.633001e-02 -1.905617e-02  
[46,] 2.693670e-02 -1.886742e-02  
[47,] 2.699745e-02 -1.933879e-02  
[48,] 2.667608e-02 -1.982824e-02  
[49,] 2.657040e-02 -1.907921e-02  
[50,] 2.669225e-02 -1.745495e-02  
[51,] 2.701090e-02 -1.700057e-02  
[52,] 2.708492e-02 -1.825580e-02  
[53,] 2.688381e-02 -1.913303e-02  
[54,] 2.706933e-02 -1.873387e-02  
[55,] 2.716769e-02 -1.838190e-02  
[56,] 2.707841e-02 -1.848858e-02  
[57,] 2.698773e-02 -1.819400e-02  
[58,] 2.685973e-02 -1.806375e-02  
[59,] 2.674017e-02 -1.873703e-02  
[60,] 2.676562e-02 -1.922027e-02  
[61,] 2.695473e-02 -1.886607e-02  
[62,] 2.737900e-02 -1.777011e-02  
[63,] 2.773882e-02 -1.585030e-02  
[64,] 2.776415e-02 -1.540860e-02  
[65,] 2.727307e-02 -1.709872e-02  
[66,] 2.681016e-02 -1.850690e-02  
[67,] 2.638544e-02 -1.888105e-02  
[68,] 2.622439e-02 -1.890619e-02  
[69,] 2.635467e-02 -1.845250e-02  
[70,] 2.698066e-02 -1.825988e-02  
[71,] 2.748068e-02 -1.848289e-02  
[72,] 2.730695e-02 -1.827928e-02  
[73,] 2.711133e-02 -1.718636e-02  
[74,] 2.726904e-02 -1.592706e-02  
[75,] 2.750638e-02 -1.590472e-02  
[76,] 2.737100e-02 -1.694465e-02  
[77,] 2.710652e-02 -1.762830e-02  
[78,] 2.712197e-02 -1.729318e-02  
[79,] 2.749136e-02 -1.644540e-02  
[80,] 2.767000e-02 -1.621343e-02  
[81,] 2.725489e-02 -1.772647e-02  
[82,] 2.664805e-02 -1.957890e-02

---

---

[83,] 2.668072e-02 -1.910443e-02  
[84,] 2.740033e-02 -1.711824e-02  
[85,] 2.760473e-02 -1.630195e-02  
[86,] 2.743705e-02 -1.646552e-02  
[87,] 2.740189e-02 -1.640044e-02  
[88,] 2.724602e-02 -1.674217e-02  
[89,] 2.723574e-02 -1.775818e-02  
[90,] 2.730652e-02 -1.836281e-02  
[91,] 2.729034e-02 -1.836442e-02  
[92,] 2.727936e-02 -1.787362e-02  
[93,] 2.756299e-02 -1.695839e-02  
[94,] 2.795899e-02 -1.627141e-02  
[95,] 2.795619e-02 -1.660730e-02  
[96,] 2.747305e-02 -1.791127e-02  
[97,] 2.735773e-02 -1.840359e-02  
[98,] 2.806856e-02 -1.663832e-02  
[99,] 2.837391e-02 -1.426356e-02  
[100,] 2.821189e-02 -1.401633e-02  
[101,] 2.803031e-02 -1.450331e-02  
[102,] 2.783654e-02 -1.483188e-02  
[103,] 2.748628e-02 -1.580008e-02  
[104,] 2.765398e-02 -1.613393e-02  
[105,] 2.810322e-02 -1.566051e-02  
[106,] 2.804673e-02 -1.553833e-02  
[107,] 2.792840e-02 -1.543047e-02  
[108,] 2.810913e-02 -1.547202e-02  
[109,] 2.785646e-02 -1.600736e-02  
[110,] 2.728369e-02 -1.618355e-02  
[111,] 2.723179e-02 -1.495994e-02  
[112,] 2.792791e-02 -1.329429e-02  
[113,] 2.832436e-02 -1.281876e-02  
[114,] 2.831693e-02 -1.407229e-02  
[115,] 2.839146e-02 -1.531085e-02  
[116,] 2.856329e-02 -1.487805e-02  
[117,] 2.843246e-02 -1.482606e-02  
[118,] 2.776861e-02 -1.665658e-02  
[119,] 2.745293e-02 -1.792592e-02  
[120,] 2.781954e-02 -1.731910e-02  
[121,] 2.810397e-02 -1.652295e-02  
[122,] 2.812623e-02 -1.647790e-02  
[123,] 2.795904e-02 -1.604704e-02  
[124,] 2.813677e-02 -1.515740e-02

---

---

[125,] 2.830530e-02 -1.489422e-02  
[126,] 2.829137e-02 -1.516425e-02  
[127,] 2.835870e-02 -1.518057e-02  
[128,] 2.807168e-02 -1.525467e-02  
[129,] 2.733327e-02 -1.615478e-02  
[130,] 2.705693e-02 -1.729473e-02  
[131,] 2.741146e-02 -1.726707e-02  
[132,] 2.776389e-02 -1.649269e-02  
[133,] 2.772612e-02 -1.644551e-02  
[134,] 2.764480e-02 -1.726382e-02  
[135,] 2.740725e-02 -1.779585e-02  
[136,] 2.729687e-02 -1.734095e-02  
[137,] 2.787336e-02 -1.621808e-02  
[138,] 2.841863e-02 -1.472455e-02  
[139,] 2.847428e-02 -1.348564e-02  
[140,] 2.822369e-02 -1.339641e-02  
[141,] 2.771252e-02 -1.458619e-02  
[142,] 2.763991e-02 -1.610749e-02  
[143,] 2.781362e-02 -1.678423e-02  
[144,] 2.794732e-02 -1.614920e-02  
[145,] 2.831092e-02 -1.468760e-02  
[146,] 2.874216e-02 -1.370123e-02  
[147,] 2.857147e-02 -1.383054e-02  
[148,] 2.824749e-02 -1.407193e-02  
[149,] 2.814869e-02 -1.364971e-02  
[150,] 2.789668e-02 -1.352509e-02  
[151,] 2.772139e-02 -1.451135e-02  
[152,] 2.779634e-02 -1.547652e-02  
[153,] 2.797365e-02 -1.600090e-02  
[154,] 2.795872e-02 -1.663738e-02  
[155,] 2.776477e-02 -1.676533e-02  
[156,] 2.777657e-02 -1.642710e-02  
[157,] 2.791799e-02 -1.618405e-02  
[158,] 2.805809e-02 -1.589411e-02  
[159,] 2.830345e-02 -1.518402e-02  
[160,] 2.833637e-02 -1.474412e-02  
[161,] 2.807224e-02 -1.539587e-02  
[162,] 2.757480e-02 -1.558028e-02  
[163,] 2.753365e-02 -1.544960e-02  
[164,] 2.768194e-02 -1.591215e-02  
[165,] 2.789059e-02 -1.610215e-02  
[166,] 2.804438e-02 -1.565616e-02

---

---

[167,] 2.785028e-02 -1.513398e-02  
[168,] 2.814358e-02 -1.509887e-02  
[169,] 2.861480e-02 -1.496832e-02  
[170,] 2.831643e-02 -1.491386e-02  
[171,] 2.768610e-02 -1.529139e-02  
[172,] 2.739511e-02 -1.533112e-02  
[173,] 2.760440e-02 -1.497819e-02  
[174,] 2.739881e-02 -1.446050e-02  
[175,] 2.741441e-02 -1.431587e-02  
[176,] 2.787290e-02 -1.423138e-02  
[177,] 2.847596e-02 -1.376654e-02  
[178,] 2.897278e-02 -1.319484e-02  
[179,] 2.881722e-02 -1.355023e-02  
[180,] 2.786183e-02 -1.484935e-02  
[181,] 2.715549e-02 -1.568095e-02  
[182,] 2.693490e-02 -1.499328e-02  
[183,] 2.753483e-02 -1.392270e-02  
[184,] 2.825264e-02 -1.311806e-02  
[185,] 2.863761e-02 -1.292600e-02  
[186,] 2.872742e-02 -1.352915e-02  
[187,] 2.838853e-02 -1.384558e-02  
[188,] 2.819815e-02 -1.354054e-02  
[189,] 2.794506e-02 -1.322728e-02  
[190,] 2.789053e-02 -1.307720e-02  
[191,] 2.837639e-02 -1.283741e-02  
[192,] 2.860025e-02 -1.212778e-02  
[193,] 2.831454e-02 -1.096254e-02  
[194,] 2.848218e-02 -1.068744e-02  
[195,] 2.840995e-02 -1.209333e-02  
[196,] 2.796623e-02 -1.432598e-02  
[197,] 2.780909e-02 -1.547831e-02  
[198,] 2.787054e-02 -1.419486e-02  
[199,] 2.787631e-02 -1.119061e-02  
[200,] 2.828504e-02 -8.940077e-03  
[201,] 2.825364e-02 -8.898119e-03  
[202,] 2.771061e-02 -1.053574e-02  
[203,] 2.710407e-02 -1.202633e-02  
[204,] 2.599119e-02 -1.269084e-02  
[205,] 2.545113e-02 -1.409062e-02  
[206,] 2.527750e-02 -1.584763e-02  
[207,] 2.548271e-02 -1.618631e-02  
[208,] 2.621985e-02 -1.473192e-02

---

---

[209,] 2.638251e-02 -1.240663e-02  
[210,] 2.711530e-02 -1.163266e-02  
[211,] 2.746742e-02 -1.151276e-02  
[212,] 2.800214e-02 -1.091825e-02  
[213,] 2.782662e-02 -1.133749e-02  
[214,] 2.683795e-02 -1.263865e-02  
[215,] 2.691184e-02 -1.145748e-02  
[216,] 2.694875e-02 -9.054931e-03  
[217,] 2.635344e-02 -7.066424e-03  
[218,] 2.644139e-02 -4.854369e-03  
[219,] 2.671931e-02 -3.801470e-03  
[220,] 2.689687e-02 -3.538263e-03  
[221,] 2.750842e-02 -2.188732e-03  
[222,] 2.775895e-02 -2.637929e-03  
[223,] 2.708437e-02 -6.554606e-03  
[224,] 2.515296e-02 -9.409597e-03  
[225,] 2.447699e-02 -7.926768e-03  
[226,] 2.552791e-02 -5.384326e-03  
[227,] 2.622063e-02 -5.943551e-03  
[228,] 2.608563e-02 -6.284081e-03  
[229,] 2.633913e-02 -3.802173e-03  
[230,] 2.654356e-02 -2.287386e-03  
[231,] 2.632683e-02 -3.332492e-03  
[232,] 2.493308e-02 -4.316717e-03  
[233,] 2.233680e-02 -2.952724e-03  
[234,] 2.074932e-02 -1.667765e-03  
[235,] 2.028863e-02 -1.156099e-03  
[236,] 2.135890e-02 3.003770e-04  
[237,] 2.285850e-02 1.544521e-03  
[238,] 2.407546e-02 2.641418e-04  
[239,] 2.272972e-02 -1.596548e-03  
[240,] 1.903662e-02 -8.538290e-04  
[241,] 1.741797e-02 3.935587e-04  
[242,] 1.809141e-02 -1.003552e-03  
[243,] 1.889443e-02 -2.857990e-03  
[244,] 1.848607e-02 -6.771157e-04  
[245,] 1.754958e-02 5.305838e-03  
[246,] 1.859651e-02 9.142455e-03  
[247,] 1.960835e-02 9.280097e-03  
[248,] 1.683027e-02 8.709852e-03  
[249,] 1.234607e-02 9.268386e-03  
[250,] 8.435657e-03 9.118006e-03

---

---

|        |               |              |
|--------|---------------|--------------|
| [251,] | 6.147521e-03  | 8.218450e-03 |
| [252,] | 6.127192e-03  | 1.107172e-02 |
| [253,] | 6.728450e-03  | 1.635329e-02 |
| [254,] | 6.935952e-03  | 1.883449e-02 |
| [255,] | 6.864269e-03  | 1.614537e-02 |
| [256,] | 6.363371e-03  | 1.227917e-02 |
| [257,] | 4.644230e-03  | 1.010478e-02 |
| [258,] | 3.314364e-03  | 9.226663e-03 |
| [259,] | 3.805460e-03  | 1.157266e-02 |
| [260,] | 1.781885e-03  | 1.509525e-02 |
| [261,] | -3.442042e-03 | 1.460230e-02 |
| [262,] | -7.611852e-03 | 1.117460e-02 |
| [263,] | -1.063158e-02 | 1.097162e-02 |
| [264,] | -1.151312e-02 | 1.623856e-02 |
| [265,] | -1.151137e-02 | 2.242166e-02 |
| [266,] | -1.230538e-02 | 2.420367e-02 |
| [267,] | -1.233419e-02 | 2.172943e-02 |
| [268,] | -1.190701e-02 | 1.986806e-02 |
| [269,] | -1.225965e-02 | 1.946871e-02 |
| [270,] | -1.360026e-02 | 2.052898e-02 |
| [271,] | -1.414981e-02 | 2.149083e-02 |
| [272,] | -1.309761e-02 | 2.002999e-02 |
| [273,] | -1.255914e-02 | 1.888633e-02 |
| [274,] | -1.294782e-02 | 2.105308e-02 |
| [275,] | -1.397683e-02 | 2.411164e-02 |
| [276,] | -1.526340e-02 | 2.549019e-02 |
| [277,] | -1.635321e-02 | 2.595570e-02 |
| [278,] | -1.723263e-02 | 2.419192e-02 |
| [279,] | -1.828179e-02 | 2.145668e-02 |
| [280,] | -1.908823e-02 | 1.987388e-02 |
| [281,] | -1.946378e-02 | 2.055142e-02 |
| [282,] | -1.933629e-02 | 2.307554e-02 |
| [283,] | -1.901607e-02 | 2.288499e-02 |
| [284,] | -2.000212e-02 | 2.102734e-02 |
| [285,] | -2.066588e-02 | 2.041098e-02 |
| [286,] | -2.047046e-02 | 2.086363e-02 |
| [287,] | -1.959432e-02 | 1.915516e-02 |
| [288,] | -1.820786e-02 | 1.685508e-02 |
| [289,] | -1.757782e-02 | 1.738255e-02 |
| [290,] | -1.763734e-02 | 1.925154e-02 |
| [291,] | -1.828135e-02 | 2.158430e-02 |
| [292,] | -1.821361e-02 | 2.347981e-02 |

---

---

|        |               |              |
|--------|---------------|--------------|
| [293,] | -1.693370e-02 | 2.221539e-02 |
| [294,] | -1.756825e-02 | 1.983473e-02 |
| [295,] | -2.006008e-02 | 1.932082e-02 |
| [296,] | -2.175712e-02 | 1.949201e-02 |
| [297,] | -2.204857e-02 | 1.777508e-02 |
| [298,] | -2.190066e-02 | 1.655067e-02 |
| [299,] | -2.166518e-02 | 1.783312e-02 |
| [300,] | -2.155181e-02 | 1.916822e-02 |
| [301,] | -2.244307e-02 | 1.890989e-02 |
| [302,] | -2.353792e-02 | 1.768217e-02 |
| [303,] | -2.407400e-02 | 1.804725e-02 |
| [304,] | -2.434775e-02 | 2.087874e-02 |
| [305,] | -2.326351e-02 | 2.297564e-02 |
| [306,] | -2.208192e-02 | 2.342918e-02 |
| [307,] | -2.222310e-02 | 2.249096e-02 |
| [308,] | -2.266153e-02 | 2.091797e-02 |
| [309,] | -2.274497e-02 | 2.167998e-02 |
| [310,] | -2.268312e-02 | 2.290481e-02 |
| [311,] | -2.281554e-02 | 2.157867e-02 |
| [312,] | -2.345890e-02 | 2.063195e-02 |
| [313,] | -2.383435e-02 | 2.219306e-02 |
| [314,] | -2.311301e-02 | 2.356677e-02 |
| [315,] | -2.267240e-02 | 2.275397e-02 |
| [316,] | -2.306499e-02 | 2.142039e-02 |
| [317,] | -2.302245e-02 | 2.151054e-02 |
| [318,] | -2.208534e-02 | 2.259505e-02 |
| [319,] | -2.183100e-02 | 2.389177e-02 |
| [320,] | -2.229028e-02 | 2.442685e-02 |
| [321,] | -2.224793e-02 | 2.407772e-02 |
| [322,] | -2.269084e-02 | 2.358129e-02 |
| [323,] | -2.364555e-02 | 2.201371e-02 |
| [324,] | -2.394976e-02 | 2.044531e-02 |
| [325,] | -2.418328e-02 | 2.059488e-02 |
| [326,] | -2.458011e-02 | 2.096329e-02 |
| [327,] | -2.462836e-02 | 2.050163e-02 |
| [328,] | -2.434276e-02 | 2.007690e-02 |
| [329,] | -2.375963e-02 | 2.075168e-02 |
| [330,] | -2.348259e-02 | 2.186605e-02 |
| [331,] | -2.370866e-02 | 2.139607e-02 |
| [332,] | -2.384801e-02 | 2.107809e-02 |
| [333,] | -2.353296e-02 | 2.200209e-02 |
| [334,] | -2.335523e-02 | 2.264453e-02 |

---



---

|        |               |              |
|--------|---------------|--------------|
| [335,] | -2.345622e-02 | 2.236540e-02 |
| [336,] | -2.387188e-02 | 2.213196e-02 |
| [337,] | -2.424905e-02 | 2.237778e-02 |
| [338,] | -2.357623e-02 | 2.218294e-02 |
| [339,] | -2.316808e-02 | 2.241786e-02 |
| [340,] | -2.334892e-02 | 2.316088e-02 |
| [341,] | -2.379025e-02 | 2.364767e-02 |
| [342,] | -2.442165e-02 | 2.325434e-02 |
| [343,] | -2.430526e-02 | 2.281203e-02 |
| [344,] | -2.322025e-02 | 2.374700e-02 |
| [345,] | -2.259034e-02 | 2.428590e-02 |
| [346,] | -2.380830e-02 | 2.328475e-02 |
| [347,] | -2.475839e-02 | 2.168556e-02 |
| [348,] | -2.473356e-02 | 2.167727e-02 |
| [349,] | -2.388373e-02 | 2.254074e-02 |
| [350,] | -2.260472e-02 | 2.313545e-02 |
| [351,] | -2.224514e-02 | 2.399536e-02 |
| [352,] | -2.248568e-02 | 2.488915e-02 |
| [353,] | -2.243104e-02 | 2.518256e-02 |
| [354,] | -2.297699e-02 | 2.442642e-02 |
| [355,] | -2.424819e-02 | 2.156586e-02 |
| [356,] | -2.543061e-02 | 1.972261e-02 |
| [357,] | -2.511407e-02 | 2.040806e-02 |
| [358,] | -2.427428e-02 | 2.238570e-02 |
| [359,] | -2.330701e-02 | 2.419392e-02 |
| [360,] | -2.280952e-02 | 2.543611e-02 |
| [361,] | -2.260246e-02 | 2.468082e-02 |
| [362,] | -2.315987e-02 | 2.362526e-02 |
| [363,] | -2.354856e-02 | 2.359181e-02 |
| [364,] | -2.227256e-02 | 2.469099e-02 |
| [365,] | -2.097367e-02 | 2.614567e-02 |
| [366,] | -2.101455e-02 | 2.628327e-02 |
| [367,] | -2.171818e-02 | 2.530319e-02 |
| [368,] | -2.236640e-02 | 2.374616e-02 |
| [369,] | -2.321750e-02 | 2.256398e-02 |
| [370,] | -2.283847e-02 | 2.265171e-02 |
| [371,] | -2.221251e-02 | 2.410343e-02 |
| [372,] | -2.244812e-02 | 2.503128e-02 |
| [373,] | -2.209087e-02 | 2.522330e-02 |
| [374,] | -2.092482e-02 | 2.646545e-02 |
| [375,] | -2.049144e-02 | 2.746545e-02 |
| [376,] | -2.181471e-02 | 2.649454e-02 |

---

---

|        |               |              |
|--------|---------------|--------------|
| [377,] | -2.333547e-02 | 2.369243e-02 |
| [378,] | -2.435447e-02 | 2.146369e-02 |
| [379,] | -2.475847e-02 | 2.113416e-02 |
| [380,] | -2.440839e-02 | 2.200628e-02 |
| [381,] | -2.353624e-02 | 2.269170e-02 |
| [382,] | -2.267281e-02 | 2.383906e-02 |
| [383,] | -2.174429e-02 | 2.495648e-02 |
| [384,] | -2.159027e-02 | 2.484598e-02 |
| [385,] | -2.243267e-02 | 2.471505e-02 |
| [386,] | -2.288126e-02 | 2.543883e-02 |
| [387,] | -2.266613e-02 | 2.600051e-02 |
| [388,] | -2.237085e-02 | 2.611858e-02 |
| [389,] | -2.169223e-02 | 2.514763e-02 |
| [390,] | -2.121308e-02 | 2.399620e-02 |
| [391,] | -2.099247e-02 | 2.447757e-02 |
| [392,] | -2.053083e-02 | 2.609972e-02 |
| [393,] | -2.040988e-02 | 2.633958e-02 |
| [394,] | -2.088884e-02 | 2.514915e-02 |
| [395,] | -2.079213e-02 | 2.451232e-02 |
| [396,] | -1.970445e-02 | 2.512450e-02 |
| [397,] | -1.911771e-02 | 2.686719e-02 |
| [398,] | -1.927779e-02 | 2.820755e-02 |
| [399,] | -1.963768e-02 | 2.827092e-02 |
| [400,] | -1.966808e-02 | 2.775501e-02 |
| [401,] | -1.939264e-02 | 2.757598e-02 |
| [402,] | -1.881828e-02 | 2.805305e-02 |
| [403,] | -1.789895e-02 | 2.878775e-02 |
| [404,] | -1.743769e-02 | 2.939548e-02 |
| [405,] | -1.728785e-02 | 2.874010e-02 |
| [406,] | -1.699434e-02 | 2.720562e-02 |
| [407,] | -1.664484e-02 | 2.712559e-02 |
| [408,] | -1.697884e-02 | 2.824967e-02 |
| [409,] | -1.797936e-02 | 2.875617e-02 |
| [410,] | -1.804867e-02 | 2.776690e-02 |
| [411,] | -1.705824e-02 | 2.638700e-02 |
| [412,] | -1.677848e-02 | 2.583414e-02 |
| [413,] | -1.788297e-02 | 2.484855e-02 |
| [414,] | -1.977303e-02 | 2.277150e-02 |
| [415,] | -2.030932e-02 | 2.162881e-02 |
| [416,] | -1.923418e-02 | 2.363747e-02 |
| [417,] | -1.767397e-02 | 2.661718e-02 |
| [418,] | -1.685315e-02 | 2.821714e-02 |

---

---

|        |               |              |
|--------|---------------|--------------|
| [419,] | -1.608300e-02 | 2.865417e-02 |
| [420,] | -1.542328e-02 | 2.900379e-02 |
| [421,] | -1.469053e-02 | 2.943388e-02 |
| [422,] | -1.380316e-02 | 3.012125e-02 |
| [423,] | -1.329271e-02 | 3.053458e-02 |
| [424,] | -1.283483e-02 | 3.074721e-02 |
| [425,] | -1.183905e-02 | 3.165006e-02 |
| [426,] | -1.121515e-02 | 3.319268e-02 |
| [427,] | -1.180477e-02 | 3.309335e-02 |
| [428,] | -1.298956e-02 | 3.224108e-02 |
| [429,] | -1.255644e-02 | 3.188139e-02 |
| [430,] | -1.017446e-02 | 3.196062e-02 |
| [431,] | -8.034967e-03 | 3.187969e-02 |
| [432,] | -8.281349e-03 | 3.084485e-02 |
| [433,] | -9.327743e-03 | 2.898715e-02 |
| [434,] | -9.151227e-03 | 2.895780e-02 |
| [435,] | -8.123164e-03 | 2.985476e-02 |
| [436,] | -7.805968e-03 | 3.036683e-02 |
| [437,] | -7.555617e-03 | 2.991917e-02 |
| [438,] | -5.835261e-03 | 3.033115e-02 |
| [439,] | -3.524288e-03 | 3.088315e-02 |
| [440,] | -3.383133e-03 | 3.085197e-02 |
| [441,] | -4.969086e-03 | 2.951046e-02 |
| [442,] | -6.272384e-03 | 2.825161e-02 |
| [443,] | -6.833689e-03 | 2.804828e-02 |
| [444,] | -5.872507e-03 | 2.851118e-02 |
| [445,] | -2.857421e-03 | 3.075036e-02 |
| [446,] | 3.325763e-04  | 3.206920e-02 |
| [447,] | 1.409107e-03  | 3.209275e-02 |
| [448,] | 7.644124e-04  | 3.186508e-02 |
| [449,] | -1.045138e-03 | 3.152224e-02 |
| [450,] | -2.221035e-03 | 3.051689e-02 |
| [451,] | -1.005175e-03 | 2.831243e-02 |
| [452,] | 8.307989e-04  | 2.656287e-02 |
| [453,] | 1.279737e-03  | 2.742324e-02 |
| [454,] | 1.365889e-03  | 2.993999e-02 |
| [455,] | 2.102494e-03  | 2.921047e-02 |
| [456,] | 3.247699e-03  | 2.618465e-02 |
| [457,] | 5.026842e-03  | 2.406791e-02 |
| [458,] | 7.697815e-03  | 2.405181e-02 |
| [459,] | 9.924691e-03  | 2.479275e-02 |
| [460,] | 1.069543e-02  | 2.459144e-02 |

---

---

|        |              |              |
|--------|--------------|--------------|
| [461,] | 9.932756e-03 | 2.339698e-02 |
| [462,] | 8.664986e-03 | 2.502837e-02 |
| [463,] | 9.145343e-03 | 2.887028e-02 |
| [464,] | 1.233077e-02 | 3.051427e-02 |
| [465,] | 1.435073e-02 | 2.784969e-02 |
| [466,] | 1.262601e-02 | 2.350737e-02 |
| [467,] | 1.024587e-02 | 2.147406e-02 |
| [468,] | 9.801323e-03 | 2.236121e-02 |
| [469,] | 1.087394e-02 | 2.448728e-02 |
| [470,] | 1.182054e-02 | 2.580515e-02 |
| [471,] | 1.220649e-02 | 2.431007e-02 |
| [472,] | 1.308160e-02 | 2.097324e-02 |
| [473,] | 1.467954e-02 | 1.832460e-02 |
| [474,] | 1.695553e-02 | 1.888312e-02 |
| [475,] | 1.930137e-02 | 1.946344e-02 |
| [476,] | 2.119698e-02 | 1.703721e-02 |
| [477,] | 2.300875e-02 | 1.452947e-02 |
| [478,] | 2.297502e-02 | 1.373550e-02 |
| [479,] | 2.223511e-02 | 1.482874e-02 |
| [480,] | 2.221808e-02 | 1.692612e-02 |
| [481,] | 2.228576e-02 | 1.753828e-02 |
| [482,] | 2.206528e-02 | 1.610241e-02 |
| [483,] | 2.101831e-02 | 1.546029e-02 |
| [484,] | 1.939741e-02 | 1.616305e-02 |
| [485,] | 1.933768e-02 | 1.603224e-02 |
| [486,] | 2.142742e-02 | 1.443467e-02 |
| [487,] | 2.364627e-02 | 1.291827e-02 |
| [488,] | 2.376406e-02 | 1.216497e-02 |
| [489,] | 2.395174e-02 | 1.271645e-02 |
| [490,] | 2.463496e-02 | 1.380215e-02 |
| [491,] | 2.526834e-02 | 1.405073e-02 |
| [492,] | 2.622040e-02 | 1.303077e-02 |
| [493,] | 2.700457e-02 | 1.091233e-02 |
| [494,] | 2.692215e-02 | 8.948817e-03 |
| [495,] | 2.661293e-02 | 8.778212e-03 |
| [496,] | 2.660169e-02 | 1.056903e-02 |
| [497,] | 2.579966e-02 | 1.228808e-02 |
| [498,] | 2.520860e-02 | 1.293151e-02 |
| [499,] | 2.585133e-02 | 1.358015e-02 |
| [500,] | 2.596750e-02 | 1.399493e-02 |
| [501,] | 2.599810e-02 | 1.364526e-02 |
| [502,] | 2.656117e-02 | 1.213570e-02 |

---

---

|        |              |              |
|--------|--------------|--------------|
| [503,] | 2.661694e-02 | 9.963286e-03 |
| [504,] | 2.692659e-02 | 8.794756e-03 |
| [505,] | 2.730900e-02 | 7.705908e-03 |
| [506,] | 2.729113e-02 | 6.010754e-03 |
| [507,] | 2.651370e-02 | 5.559843e-03 |
| [508,] | 2.600550e-02 | 6.670125e-03 |
| [509,] | 2.667222e-02 | 6.883707e-03 |
| [510,] | 2.786191e-02 | 5.416398e-03 |
| [511,] | 2.855306e-02 | 4.406537e-03 |
| [512,] | 2.838238e-02 | 4.941220e-03 |
| [513,] | 2.842533e-02 | 6.458279e-03 |
| [514,] | 2.825144e-02 | 7.849487e-03 |
| [515,] | 2.816994e-02 | 7.785973e-03 |
| [516,] | 2.813247e-02 | 5.610292e-03 |
| [517,] | 2.788137e-02 | 3.540757e-03 |
| [518,] | 2.819874e-02 | 3.824055e-03 |
| [519,] | 2.816933e-02 | 4.484740e-03 |
| [520,] | 2.786627e-02 | 3.631269e-03 |
| [521,] | 2.816347e-02 | 2.988384e-03 |
| [522,] | 2.834532e-02 | 2.883387e-03 |
| [523,] | 2.858400e-02 | 2.481129e-03 |
| [524,] | 2.878198e-02 | 2.543912e-03 |
| [525,] | 2.892927e-02 | 3.232346e-03 |
| [526,] | 2.903670e-02 | 3.071083e-03 |
| [527,] | 2.929071e-02 | 2.124016e-03 |
| [528,] | 2.918580e-02 | 2.115862e-03 |
| [529,] | 2.915491e-02 | 3.401220e-03 |
| [530,] | 2.909878e-02 | 4.137335e-03 |
| [531,] | 2.887826e-02 | 3.295092e-03 |
| [532,] | 2.865268e-02 | 2.088938e-03 |
| [533,] | 2.873930e-02 | 1.850857e-03 |
| [534,] | 2.895700e-02 | 2.643373e-03 |
| [535,] | 2.929982e-02 | 3.056847e-03 |
| [536,] | 2.934405e-02 | 2.699639e-03 |
| [537,] | 2.934862e-02 | 2.920980e-03 |
| [538,] | 2.937395e-02 | 3.291012e-03 |
| [539,] | 2.948772e-02 | 2.731107e-03 |
| [540,] | 2.960912e-02 | 2.124198e-03 |
| [541,] | 2.964891e-02 | 2.396511e-03 |
| [542,] | 2.980692e-02 | 2.503236e-03 |
| [543,] | 2.977824e-02 | 1.982113e-03 |
| [544,] | 2.976864e-02 | 2.338603e-03 |

---

---

|        |              |               |
|--------|--------------|---------------|
| [545,] | 2.963617e-02 | 3.172780e-03  |
| [546,] | 2.933593e-02 | 2.665699e-03  |
| [547,] | 2.953120e-02 | 1.769419e-03  |
| [548,] | 2.962346e-02 | 1.835827e-03  |
| [549,] | 2.959004e-02 | 2.200375e-03  |
| [550,] | 2.961811e-02 | 2.249449e-03  |
| [551,] | 2.972533e-02 | 2.436157e-03  |
| [552,] | 2.992670e-02 | 2.821727e-03  |
| [553,] | 3.001055e-02 | 2.680228e-03  |
| [554,] | 3.009101e-02 | 2.073463e-03  |
| [555,] | 3.010618e-02 | 2.420955e-03  |
| [556,] | 2.981977e-02 | 3.959708e-03  |
| [557,] | 2.948053e-02 | 4.782915e-03  |
| [558,] | 2.927928e-02 | 3.851183e-03  |
| [559,] | 2.895724e-02 | 2.763288e-03  |
| [560,] | 2.893746e-02 | 2.968106e-03  |
| [561,] | 2.925506e-02 | 3.276203e-03  |
| [562,] | 2.956979e-02 | 2.691647e-03  |
| [563,] | 2.984862e-02 | 1.458441e-03  |
| [564,] | 2.995440e-02 | 5.162015e-05  |
| [565,] | 2.997202e-02 | -4.579973e-04 |
| [566,] | 2.961933e-02 | -4.430556e-05 |
| [567,] | 2.930690e-02 | 1.050964e-03  |
| [568,] | 2.908657e-02 | 2.703465e-03  |
| [569,] | 2.894540e-02 | 3.228557e-03  |
| [570,] | 2.910409e-02 | 1.621239e-03  |
| [571,] | 2.931714e-02 | 2.016450e-04  |
| [572,] | 2.955043e-02 | 8.283266e-04  |
| [573,] | 2.954237e-02 | 2.092640e-03  |
| [574,] | 2.952133e-02 | 2.699680e-03  |
| [575,] | 2.942183e-02 | 2.835984e-03  |
| [576,] | 2.925111e-02 | 2.990927e-03  |
| [577,] | 2.914759e-02 | 3.532760e-03  |
| [578,] | 2.918492e-02 | 3.996601e-03  |
| [579,] | 2.946096e-02 | 3.974272e-03  |
| [580,] | 2.968314e-02 | 3.110750e-03  |
| [581,] | 2.941171e-02 | 1.565773e-03  |
| [582,] | 2.895397e-02 | 1.037318e-03  |
| [583,] | 2.872262e-02 | 1.869375e-03  |
| [584,] | 2.911711e-02 | 2.713094e-03  |
| [585,] | 2.966561e-02 | 3.612144e-03  |
| [586,] | 2.969460e-02 | 4.893473e-03  |

---

---

|        |              |              |
|--------|--------------|--------------|
| [587,] | 2.944595e-02 | 6.243117e-03 |
| [588,] | 2.910091e-02 | 7.695863e-03 |
| [589,] | 2.890392e-02 | 8.389414e-03 |
| [590,] | 2.927537e-02 | 7.498813e-03 |
| [591,] | 2.967787e-02 | 6.128695e-03 |
| [592,] | 2.947266e-02 | 5.269988e-03 |
| [593,] | 2.920850e-02 | 4.847544e-03 |
| [594,] | 2.896876e-02 | 5.018580e-03 |
| [595,] | 2.885172e-02 | 6.012157e-03 |
| [596,] | 2.870106e-02 | 7.159729e-03 |
| [597,] | 2.844164e-02 | 7.374170e-03 |
| [598,] | 2.824698e-02 | 6.317895e-03 |
| [599,] | 2.830936e-02 | 5.028891e-03 |
| [600,] | 2.805040e-02 | 4.650337e-03 |
| [601,] | 2.738372e-02 | 5.559436e-03 |
| [602,] | 2.683962e-02 | 6.825333e-03 |
| [603,] | 2.693037e-02 | 7.104912e-03 |
| [604,] | 2.767702e-02 | 7.010327e-03 |
| [605,] | 2.831687e-02 | 7.851977e-03 |
| [606,] | 2.848514e-02 | 8.981869e-03 |
| [607,] | 2.854042e-02 | 9.264612e-03 |
| [608,] | 2.804371e-02 | 8.881118e-03 |
| [609,] | 2.727194e-02 | 8.336686e-03 |
| [610,] | 2.721320e-02 | 8.285115e-03 |
| [611,] | 2.713346e-02 | 9.894002e-03 |
| [612,] | 2.676499e-02 | 1.286649e-02 |
| [613,] | 2.624900e-02 | 1.461612e-02 |
| [614,] | 2.599814e-02 | 1.473152e-02 |
| [615,] | 2.542591e-02 | 1.511080e-02 |
| [616,] | 2.524641e-02 | 1.549529e-02 |
| [617,] | 2.597691e-02 | 1.457759e-02 |
| [618,] | 2.667071e-02 | 1.445323e-02 |
| [619,] | 2.596579e-02 | 1.577988e-02 |
| [620,] | 2.513475e-02 | 1.645668e-02 |
| [621,] | 2.556152e-02 | 1.603891e-02 |
| [622,] | 2.605041e-02 | 1.471426e-02 |
| [623,] | 2.545185e-02 | 1.335852e-02 |
| [624,] | 2.447521e-02 | 1.329777e-02 |
| [625,] | 2.404347e-02 | 1.441758e-02 |
| [626,] | 2.393240e-02 | 1.595650e-02 |
| [627,] | 2.355405e-02 | 1.720470e-02 |
| [628,] | 2.317585e-02 | 1.742592e-02 |

---

---

|        |               |              |
|--------|---------------|--------------|
| [629,] | 2.395934e-02  | 1.761892e-02 |
| [630,] | 2.451044e-02  | 1.794061e-02 |
| [631,] | 2.420200e-02  | 1.782639e-02 |
| [632,] | 2.353717e-02  | 1.794041e-02 |
| [633,] | 2.342069e-02  | 1.929175e-02 |
| [634,] | 2.344023e-02  | 2.028007e-02 |
| [635,] | 2.283848e-02  | 2.070242e-02 |
| [636,] | 2.206811e-02  | 2.114116e-02 |
| [637,] | 2.162009e-02  | 2.032479e-02 |
| [638,] | 2.137478e-02  | 1.881477e-02 |
| [639,] | 2.106720e-02  | 1.899560e-02 |
| [640,] | 1.985867e-02  | 2.085177e-02 |
| [641,] | 1.875878e-02  | 2.324467e-02 |
| [642,] | 1.838238e-02  | 2.463007e-02 |
| [643,] | 1.792266e-02  | 2.537650e-02 |
| [644,] | 1.674160e-02  | 2.562190e-02 |
| [645,] | 1.623119e-02  | 2.501017e-02 |
| [646,] | 1.724145e-02  | 2.410698e-02 |
| [647,] | 1.784172e-02  | 2.308315e-02 |
| [648,] | 1.733487e-02  | 2.265519e-02 |
| [649,] | 1.704367e-02  | 2.366280e-02 |
| [650,] | 1.691136e-02  | 2.543268e-02 |
| [651,] | 1.611397e-02  | 2.661065e-02 |
| [652,] | 1.488329e-02  | 2.723027e-02 |
| [653,] | 1.357720e-02  | 2.819483e-02 |
| [654,] | 1.206821e-02  | 2.879572e-02 |
| [655,] | 1.084737e-02  | 2.872601e-02 |
| [656,] | 1.046551e-02  | 2.888925e-02 |
| [657,] | 1.076315e-02  | 2.936305e-02 |
| [658,] | 1.057453e-02  | 3.034140e-02 |
| [659,] | 9.297077e-03  | 3.223588e-02 |
| [660,] | 7.956156e-03  | 3.369079e-02 |
| [661,] | 7.216876e-03  | 3.273121e-02 |
| [662,] | 6.449736e-03  | 3.111118e-02 |
| [663,] | 4.648893e-03  | 3.109339e-02 |
| [664,] | 2.591964e-03  | 3.281596e-02 |
| [665,] | 1.296322e-03  | 3.382419e-02 |
| [666,] | 2.268695e-04  | 3.372392e-02 |
| [667,] | -1.382867e-03 | 3.357492e-02 |
| [668,] | -3.411153e-03 | 3.357238e-02 |
| [669,] | -5.122122e-03 | 3.345386e-02 |
| [670,] | -5.072234e-03 | 3.265369e-02 |

---



---

|        |               |              |
|--------|---------------|--------------|
| [671,] | -3.664165e-03 | 3.310144e-02 |
| [672,] | -3.817554e-03 | 3.449755e-02 |
| [673,] | -6.050952e-03 | 3.527751e-02 |
| [674,] | -8.757995e-03 | 3.488495e-02 |
| [675,] | -1.120822e-02 | 3.351353e-02 |
| [676,] | -1.215664e-02 | 3.250485e-02 |
| [677,] | -1.195218e-02 | 3.254748e-02 |
| [678,] | -1.270092e-02 | 3.260602e-02 |
| [679,] | -1.478305e-02 | 3.216844e-02 |
| [680,] | -1.640721e-02 | 3.198401e-02 |
| [681,] | -1.692517e-02 | 3.233751e-02 |
| [682,] | -1.750594e-02 | 3.196956e-02 |
| [683,] | -1.908482e-02 | 3.070930e-02 |
| [684,] | -2.073320e-02 | 2.895210e-02 |
| [685,] | -2.154525e-02 | 2.778911e-02 |
| [686,] | -2.150550e-02 | 2.810348e-02 |
| [687,] | -2.168012e-02 | 2.850373e-02 |
| [688,] | -2.262222e-02 | 2.758040e-02 |
| [689,] | -2.333034e-02 | 2.666109e-02 |
| [690,] | -2.322457e-02 | 2.656555e-02 |
| [691,] | -2.317676e-02 | 2.667384e-02 |
| [692,] | -2.363682e-02 | 2.626942e-02 |
| [693,] | -2.437806e-02 | 2.517479e-02 |
| [694,] | -2.501302e-02 | 2.387927e-02 |
| [695,] | -2.532781e-02 | 2.317586e-02 |
| [696,] | -2.548915e-02 | 2.331170e-02 |
| [697,] | -2.565141e-02 | 2.336859e-02 |
| [698,] | -2.614991e-02 | 2.248341e-02 |
| [699,] | -2.683221e-02 | 2.135982e-02 |
| [700,] | -2.713757e-02 | 2.092122e-02 |
| [701,] | -2.718289e-02 | 2.096871e-02 |
| [702,] | -2.724197e-02 | 2.107426e-02 |
| [703,] | -2.727453e-02 | 2.094939e-02 |
| [704,] | -2.758705e-02 | 2.010430e-02 |
| [705,] | -2.817945e-02 | 1.866140e-02 |
| [706,] | -2.863236e-02 | 1.756102e-02 |
| [707,] | -2.875146e-02 | 1.723248e-02 |
| [708,] | -2.864491e-02 | 1.748557e-02 |
| [709,] | -2.851796e-02 | 1.794128e-02 |
| [710,] | -2.853472e-02 | 1.792565e-02 |
| [711,] | -2.864461e-02 | 1.737178e-02 |
| [712,] | -2.878542e-02 | 1.700016e-02 |

---

---

|        |               |              |
|--------|---------------|--------------|
| [713,] | -2.895705e-02 | 1.671944e-02 |
| [714,] | -2.905456e-02 | 1.621448e-02 |
| [715,] | -2.920711e-02 | 1.593094e-02 |
| [716,] | -2.938843e-02 | 1.568379e-02 |
| [717,] | -2.957234e-02 | 1.496868e-02 |
| [718,] | -2.967827e-02 | 1.444645e-02 |
| [719,] | -2.957858e-02 | 1.465574e-02 |
| [720,] | -2.952004e-02 | 1.468132e-02 |
| [721,] | -2.965021e-02 | 1.415588e-02 |
| [722,] | -2.980326e-02 | 1.375197e-02 |
| [723,] | -2.987308e-02 | 1.363353e-02 |
| [724,] | -2.985203e-02 | 1.379106e-02 |
| [725,] | -2.980759e-02 | 1.406013e-02 |
| [726,] | -2.990821e-02 | 1.366911e-02 |
| [727,] | -3.010261e-02 | 1.274716e-02 |
| [728,] | -3.019304e-02 | 1.223849e-02 |
| [729,] | -3.024795e-02 | 1.234948e-02 |
| [730,] | -3.025477e-02 | 1.272494e-02 |
| [731,] | -3.020759e-02 | 1.285295e-02 |
| [732,] | -3.015747e-02 | 1.256325e-02 |
| [733,] | -3.013113e-02 | 1.228689e-02 |
| [734,] | -3.025211e-02 | 1.236237e-02 |
| [735,] | -3.030632e-02 | 1.251886e-02 |
| [736,] | -3.019261e-02 | 1.256229e-02 |
| [737,] | -3.013944e-02 | 1.260801e-02 |
| [738,] | -3.020184e-02 | 1.263392e-02 |
| [739,] | -3.031256e-02 | 1.240136e-02 |
| [740,] | -3.043091e-02 | 1.187420e-02 |
| [741,] | -3.046168e-02 | 1.145255e-02 |
| [742,] | -3.040669e-02 | 1.135369e-02 |
| [743,] | -3.040534e-02 | 1.135238e-02 |
| [744,] | -3.049491e-02 | 1.121493e-02 |
| [745,] | -3.053533e-02 | 1.108225e-02 |
| [746,] | -3.043146e-02 | 1.139784e-02 |
| [747,] | -3.023340e-02 | 1.208054e-02 |
| [748,] | -3.012951e-02 | 1.240560e-02 |
| [749,] | -3.028543e-02 | 1.200158e-02 |
| [750,] | -3.049299e-02 | 1.119416e-02 |
| [751,] | -3.057492e-02 | 1.058000e-02 |
| [752,] | -3.058781e-02 | 1.053415e-02 |
| [753,] | -3.056672e-02 | 1.106664e-02 |
| [754,] | -3.042845e-02 | 1.189095e-02 |

---

---

|        |               |              |
|--------|---------------|--------------|
| [755,] | -3.031060e-02 | 1.239438e-02 |
| [756,] | -3.037950e-02 | 1.198181e-02 |
| [757,] | -3.054804e-02 | 1.102111e-02 |
| [758,] | -3.064241e-02 | 1.037597e-02 |
| [759,] | -3.065697e-02 | 1.040567e-02 |
| [760,] | -3.051968e-02 | 1.104083e-02 |
| [761,] | -3.033439e-02 | 1.181003e-02 |
| [762,] | -3.028404e-02 | 1.208494e-02 |
| [763,] | -3.034310e-02 | 1.194760e-02 |
| [764,] | -3.046853e-02 | 1.167455e-02 |
| [765,] | -3.057567e-02 | 1.112116e-02 |
| [766,] | -3.066197e-02 | 1.060296e-02 |
| [767,] | -3.068658e-02 | 1.049676e-02 |
| [768,] | -3.063484e-02 | 1.052250e-02 |
| [769,] | -3.059907e-02 | 1.071200e-02 |
| [770,] | -3.051459e-02 | 1.124405e-02 |
| [771,] | -3.042653e-02 | 1.176677e-02 |
| [772,] | -3.036879e-02 | 1.187587e-02 |
| [773,] | -3.047219e-02 | 1.164003e-02 |
| [774,] | -3.054499e-02 | 1.118051e-02 |
| [775,] | -3.061446e-02 | 1.060576e-02 |
| [776,] | -3.075762e-02 | 1.005047e-02 |
| [777,] | -3.083337e-02 | 9.721260e-03 |
| [778,] | -3.076327e-02 | 9.882471e-03 |
| [779,] | -3.071750e-02 | 1.011537e-02 |
| [780,] | -3.074038e-02 | 9.900638e-03 |
| [781,] | -3.073449e-02 | 9.769855e-03 |
| [782,] | -3.063896e-02 | 1.014226e-02 |
| [783,] | -3.061546e-02 | 1.044283e-02 |
| [784,] | -3.069079e-02 | 1.019419e-02 |
| [785,] | -3.072684e-02 | 1.008851e-02 |
| [786,] | -3.068090e-02 | 1.062442e-02 |
| [787,] | -3.064165e-02 | 1.076639e-02 |
| [788,] | -3.071972e-02 | 1.001761e-02 |
| [789,] | -3.079447e-02 | 9.538877e-03 |
| [790,] | -3.076977e-02 | 9.905031e-03 |
| [791,] | -3.068928e-02 | 1.033576e-02 |
| [792,] | -3.065591e-02 | 1.038520e-02 |
| [793,] | -3.068085e-02 | 1.018457e-02 |
| [794,] | -3.074693e-02 | 9.863202e-03 |
| [795,] | -3.074603e-02 | 9.773308e-03 |
| [796,] | -3.069887e-02 | 1.014121e-02 |

---

---

|        |               |              |
|--------|---------------|--------------|
| [797,] | -3.069198e-02 | 1.036060e-02 |
| [798,] | -3.070582e-02 | 9.951005e-03 |
| [799,] | -3.074836e-02 | 9.547645e-03 |
| [800,] | -3.075284e-02 | 9.706318e-03 |
| [801,] | -3.069344e-02 | 9.986307e-03 |
| [802,] | -3.068916e-02 | 9.857954e-03 |
| [803,] | -3.072799e-02 | 9.667326e-03 |
| [804,] | -3.067625e-02 | 9.892403e-03 |
| [805,] | -3.061872e-02 | 1.003850e-02 |
| [806,] | -3.073286e-02 | 9.624183e-03 |
| [807,] | -3.086231e-02 | 9.223416e-03 |
| [808,] | -3.084338e-02 | 9.412586e-03 |
| [809,] | -3.076356e-02 | 9.765861e-03 |
| [810,] | -3.075506e-02 | 9.657927e-03 |
| [811,] | -3.084181e-02 | 9.131425e-03 |
| [812,] | -3.091506e-02 | 8.876354e-03 |
| [813,] | -3.089437e-02 | 9.328137e-03 |
| [814,] | -3.076410e-02 | 9.944193e-03 |
| [815,] | -3.067863e-02 | 1.020791e-02 |
| [816,] | -3.063713e-02 | 1.024088e-02 |
| [817,] | -3.062440e-02 | 1.028783e-02 |
| [818,] | -3.064921e-02 | 1.041815e-02 |
| [819,] | -3.066649e-02 | 1.038211e-02 |
| [820,] | -3.067966e-02 | 1.020249e-02 |
| [821,] | -3.068755e-02 | 1.039712e-02 |
| [822,] | -3.065301e-02 | 1.075705e-02 |
| [823,] | -3.065507e-02 | 1.066297e-02 |
| [824,] | -3.070027e-02 | 1.026518e-02 |
| [825,] | -3.067633e-02 | 1.027142e-02 |
| [826,] | -3.055169e-02 | 1.085235e-02 |
| [827,] | -3.048563e-02 | 1.120578e-02 |
| [828,] | -3.058762e-02 | 1.088588e-02 |
| [829,] | -3.065790e-02 | 1.055913e-02 |
| [830,] | -3.060342e-02 | 1.061595e-02 |
| [831,] | -3.057432e-02 | 1.061675e-02 |
| [832,] | -3.055879e-02 | 1.067444e-02 |
| [833,] | -3.056396e-02 | 1.079691e-02 |
| [834,] | -3.065324e-02 | 1.055338e-02 |
| [835,] | -3.067160e-02 | 1.049590e-02 |
| [836,] | -3.057488e-02 | 1.095807e-02 |
| [837,] | -3.054620e-02 | 1.119664e-02 |
| [838,] | -3.063099e-02 | 1.086075e-02 |

---

---

|        |               |              |
|--------|---------------|--------------|
| [839,] | -3.071987e-02 | 1.038729e-02 |
| [840,] | -3.072593e-02 | 1.033490e-02 |
| [841,] | -3.069001e-02 | 1.063008e-02 |
| [842,] | -3.060201e-02 | 1.079633e-02 |
| [843,] | -3.053487e-02 | 1.097448e-02 |
| [844,] | -3.048925e-02 | 1.129510e-02 |
| [845,] | -3.043434e-02 | 1.176181e-02 |
| [846,] | -3.038426e-02 | 1.221660e-02 |
| [847,] | -3.037606e-02 | 1.229880e-02 |
| [848,] | -3.034498e-02 | 1.224587e-02 |
| [849,] | -3.026580e-02 | 1.227392e-02 |
| [850,] | -3.024561e-02 | 1.224532e-02 |
| [851,] | -3.033994e-02 | 1.212443e-02 |
| [852,] | -3.043195e-02 | 1.173281e-02 |
| [853,] | -3.052704e-02 | 1.113291e-02 |
| [854,] | -3.059303e-02 | 1.081184e-02 |
| [855,] | -3.055767e-02 | 1.093219e-02 |
| [856,] | -3.050622e-02 | 1.119234e-02 |
| [857,] | -3.048010e-02 | 1.142369e-02 |
| [858,] | -3.046607e-02 | 1.167499e-02 |
| [859,] | -3.043770e-02 | 1.183457e-02 |
| [860,] | -3.042671e-02 | 1.188050e-02 |
| [861,] | -3.040331e-02 | 1.194944e-02 |
| [862,] | -3.039568e-02 | 1.191710e-02 |
| [863,] | -3.043413e-02 | 1.159256e-02 |
| [864,] | -3.047875e-02 | 1.136578e-02 |
| [865,] | -3.049347e-02 | 1.155867e-02 |
| [866,] | -3.046762e-02 | 1.188778e-02 |
| [867,] | -3.043436e-02 | 1.211029e-02 |
| [868,] | -3.036361e-02 | 1.229928e-02 |
| [869,] | -3.026923e-02 | 1.261735e-02 |
| [870,] | -3.021381e-02 | 1.287693e-02 |
| [871,] | -3.015666e-02 | 1.276734e-02 |
| [872,] | -3.016354e-02 | 1.247007e-02 |
| [873,] | -3.021553e-02 | 1.226548e-02 |
| [874,] | -3.028561e-02 | 1.228740e-02 |
| [875,] | -3.037711e-02 | 1.223760e-02 |
| [876,] | -3.041259e-02 | 1.213450e-02 |
| [877,] | -3.034758e-02 | 1.237423e-02 |
| [878,] | -3.034110e-02 | 1.233072e-02 |
| [879,] | -3.042145e-02 | 1.180310e-02 |
| [880,] | -3.041066e-02 | 1.170164e-02 |

---

---

|        |               |              |
|--------|---------------|--------------|
| [881,] | -3.030217e-02 | 1.220089e-02 |
| [882,] | -3.020924e-02 | 1.288559e-02 |
| [883,] | -3.010971e-02 | 1.353137e-02 |
| [884,] | -2.998333e-02 | 1.384974e-02 |
| [885,] | -2.998182e-02 | 1.364258e-02 |
| [886,] | -3.011404e-02 | 1.316790e-02 |
| [887,] | -3.015376e-02 | 1.303692e-02 |
| [888,] | -2.998938e-02 | 1.349891e-02 |
| [889,] | -2.979682e-02 | 1.410488e-02 |
| [890,] | -2.978560e-02 | 1.429983e-02 |
| [891,] | -2.993688e-02 | 1.382635e-02 |
| [892,] | -3.013419e-02 | 1.299265e-02 |
| [893,] | -3.027840e-02 | 1.243364e-02 |
| [894,] | -3.030291e-02 | 1.237304e-02 |
| [895,] | -3.025986e-02 | 1.252733e-02 |
| [896,] | -3.025179e-02 | 1.259120e-02 |
| [897,] | -3.024174e-02 | 1.262454e-02 |
| [898,] | -3.021163e-02 | 1.273385e-02 |
| [899,] | -3.022036e-02 | 1.281766e-02 |
| [900,] | -3.023371e-02 | 1.290202e-02 |
| [901,] | -3.015587e-02 | 1.300554e-02 |
| [902,] | -3.005710e-02 | 1.307012e-02 |
| [903,] | -3.003688e-02 | 1.311816e-02 |
| [904,] | -3.006020e-02 | 1.317203e-02 |
| [905,] | -3.004691e-02 | 1.323697e-02 |
| [906,] | -3.000547e-02 | 1.340645e-02 |
| [907,] | -2.998557e-02 | 1.360200e-02 |
| [908,] | -3.005123e-02 | 1.357787e-02 |
| [909,] | -3.009474e-02 | 1.342410e-02 |
| [910,] | -2.999582e-02 | 1.353515e-02 |
| [911,] | -2.984575e-02 | 1.388645e-02 |
| [912,] | -2.982065e-02 | 1.400588e-02 |
| [913,] | -2.995878e-02 | 1.376248e-02 |
| [914,] | -3.001507e-02 | 1.354487e-02 |
| [915,] | -2.998647e-02 | 1.359724e-02 |
| [916,] | -2.994856e-02 | 1.382791e-02 |
| [917,] | -2.991706e-02 | 1.416639e-02 |
| [918,] | -2.994978e-02 | 1.417690e-02 |
| [919,] | -3.008048e-02 | 1.361235e-02 |
| [920,] | -3.022822e-02 | 1.306855e-02 |
| [921,] | -3.026281e-02 | 1.299428e-02 |
| [922,] | -3.018480e-02 | 1.314681e-02 |

---

---

|        |               |              |
|--------|---------------|--------------|
| [923,] | -3.014649e-02 | 1.321138e-02 |
| [924,] | -3.014909e-02 | 1.312823e-02 |
| [925,] | -3.015238e-02 | 1.306863e-02 |
| [926,] | -3.011902e-02 | 1.315012e-02 |
| [927,] | -3.010664e-02 | 1.303394e-02 |
| [928,] | -3.016498e-02 | 1.244068e-02 |
| [929,] | -3.026969e-02 | 1.184787e-02 |
| [930,] | -3.033569e-02 | 1.171054e-02 |
| [931,] | -3.029150e-02 | 1.189312e-02 |
| [932,] | -3.022844e-02 | 1.244355e-02 |
| [933,] | -3.009559e-02 | 1.318409e-02 |
| [934,] | -3.004106e-02 | 1.348180e-02 |
| [935,] | -3.011933e-02 | 1.338666e-02 |
| [936,] | -3.016455e-02 | 1.333776e-02 |
| [937,] | -3.014726e-02 | 1.328975e-02 |
| [938,] | -3.016696e-02 | 1.314073e-02 |
| [939,] | -3.021503e-02 | 1.288671e-02 |
| [940,] | -3.022637e-02 | 1.274073e-02 |
| [941,] | -3.024147e-02 | 1.274905e-02 |
| [942,] | -3.030011e-02 | 1.248009e-02 |
| [943,] | -3.032096e-02 | 1.218614e-02 |
| [944,] | -3.021224e-02 | 1.267513e-02 |
| [945,] | -3.006100e-02 | 1.338623e-02 |
| [946,] | -3.015430e-02 | 1.304296e-02 |
| [947,] | -3.031560e-02 | 1.207279e-02 |
| [948,] | -3.035651e-02 | 1.172889e-02 |
| [949,] | -3.035765e-02 | 1.200581e-02 |
| [950,] | -3.033740e-02 | 1.225686e-02 |
| [951,] | -3.033593e-02 | 1.221295e-02 |
| [952,] | -3.034816e-02 | 1.209838e-02 |
| [953,] | -3.037128e-02 | 1.207598e-02 |
| [954,] | -3.043282e-02 | 1.178699e-02 |
| [955,] | -3.050818e-02 | 1.131836e-02 |
| [956,] | -3.053699e-02 | 1.120785e-02 |
| [957,] | -3.050312e-02 | 1.140430e-02 |
| [958,] | -3.048698e-02 | 1.149305e-02 |
| [959,] | -3.053291e-02 | 1.121993e-02 |
| [960,] | -3.065228e-02 | 1.069146e-02 |
| [961,] | -3.072677e-02 | 1.032246e-02 |
| [962,] | -3.074425e-02 | 1.027756e-02 |
| [963,] | -3.071102e-02 | 1.032140e-02 |
| [964,] | -3.069914e-02 | 1.026445e-02 |

---

---

|         |               |               |
|---------|---------------|---------------|
| [965,]  | -3.076600e-02 | 1.001072e-02  |
| [966,]  | -3.083752e-02 | 9.615035e-03  |
| [967,]  | -3.089011e-02 | 9.339388e-03  |
| [968,]  | -3.091744e-02 | 9.232565e-03  |
| [969,]  | -3.091679e-02 | 9.137713e-03  |
| [970,]  | -3.091199e-02 | 9.048724e-03  |
| [971,]  | -3.091262e-02 | 9.024422e-03  |
| [972,]  | -3.089711e-02 | 9.060272e-03  |
| [973,]  | -3.087490e-02 | 9.144697e-03  |
| [974,]  | -3.090797e-02 | 9.114011e-03  |
| [975,]  | -3.097644e-02 | 8.695891e-03  |
| [976,]  | -3.103670e-02 | 7.970421e-03  |
| [977,]  | -3.106753e-02 | 7.529533e-03  |
| [978,]  | -3.109062e-02 | 7.414284e-03  |
| [979,]  | -3.110045e-02 | 7.025203e-03  |
| [980,]  | -3.114160e-02 | 6.470360e-03  |
| [981,]  | -3.120390e-02 | 6.232263e-03  |
| [982,]  | -3.122714e-02 | 6.246520e-03  |
| [983,]  | -3.123284e-02 | 6.351450e-03  |
| [984,]  | -3.123296e-02 | 6.459321e-03  |
| [985,]  | -3.125884e-02 | 6.150177e-03  |
| [986,]  | -3.129056e-02 | 5.543072e-03  |
| [987,]  | -3.132417e-02 | 5.164726e-03  |
| [988,]  | -3.141194e-02 | 4.887168e-03  |
| [989,]  | -3.143679e-02 | 4.584692e-03  |
| [990,]  | -3.139782e-02 | 4.493609e-03  |
| [991,]  | -3.134343e-02 | 4.534810e-03  |
| [992,]  | -3.130325e-02 | 4.460906e-03  |
| [993,]  | -3.134342e-02 | 4.230523e-03  |
| [994,]  | -3.142976e-02 | 3.771496e-03  |
| [995,]  | -3.145918e-02 | 3.141249e-03  |
| [996,]  | -3.146563e-02 | 2.772614e-03  |
| [997,]  | -3.145194e-02 | 2.586935e-03  |
| [998,]  | -3.142506e-02 | 2.043514e-03  |
| [999,]  | -3.144158e-02 | 1.385891e-03  |
| [1000,] | -3.145896e-02 | 9.695415e-04  |
| [1001,] | -3.144935e-02 | 4.154219e-04  |
| [1002,] | -3.142177e-02 | -4.286330e-04 |
| [1003,] | -3.135051e-02 | -1.155332e-03 |
| [1004,] | -3.131983e-02 | -1.259192e-03 |
| [1005,] | -3.139460e-02 | -7.122271e-04 |
| [1006,] | -3.144437e-02 | -2.685536e-04 |

---



---

[1007,] -3.147350e-02 -6.145586e-04  
[1008,] -3.146743e-02 -1.436863e-03  
[1009,] -3.139993e-02 -2.009812e-03  
[1010,] -3.130392e-02 -2.085527e-03  
[1011,] -3.126083e-02 -1.928651e-03  
[1012,] -3.126119e-02 -2.124780e-03  
[1013,] -3.119150e-02 -3.023005e-03  
[1014,] -3.109435e-02 -4.051339e-03  
[1015,] -3.111965e-02 -4.589545e-03  
[1016,] -3.112970e-02 -4.927800e-03  
[1017,] -3.107913e-02 -5.375407e-03  
[1018,] -3.108863e-02 -5.730071e-03  
[1019,] -3.109737e-02 -5.972749e-03  
[1020,] -3.105990e-02 -6.343536e-03  
[1021,] -3.098322e-02 -6.843525e-03  
[1022,] -3.090405e-02 -7.290572e-03  
[1023,] -3.090637e-02 -7.602382e-03  
[1024,] -3.092479e-02 -7.725060e-03  
[1025,] -3.091876e-02 -7.687217e-03  
[1026,] -3.089616e-02 -7.689643e-03  
[1027,] -3.081267e-02 -7.794022e-03  
[1028,] -3.071714e-02 -8.105114e-03  
[1029,] -3.057762e-02 -8.845958e-03  
[1030,] -3.039278e-02 -9.911062e-03  
[1031,] -3.028586e-02 -1.056762e-02  
[1032,] -3.026540e-02 -1.056823e-02  
[1033,] -3.023467e-02 -1.064009e-02  
[1034,] -3.018158e-02 -1.098149e-02  
[1035,] -3.013444e-02 -1.133602e-02  
[1036,] -3.000807e-02 -1.148647e-02  
[1037,] -2.996594e-02 -1.130705e-02  
[1038,] -2.997714e-02 -1.120390e-02  
[1039,] -2.999603e-02 -1.154870e-02  
[1040,] -2.994576e-02 -1.215655e-02  
[1041,] -2.986011e-02 -1.262510e-02  
[1042,] -2.990855e-02 -1.272467e-02  
[1043,] -2.998342e-02 -1.257502e-02  
[1044,] -2.993475e-02 -1.250306e-02  
[1045,] -2.967295e-02 -1.312561e-02  
[1046,] -2.930870e-02 -1.440247e-02  
[1047,] -2.909291e-02 -1.541735e-02  
[1048,] -2.903684e-02 -1.584900e-02

---

---

[1049,] -2.901759e-02 -1.586402e-02  
[1050,] -2.910652e-02 -1.542773e-02  
[1051,] -2.928447e-02 -1.476699e-02  
[1052,] -2.929478e-02 -1.473260e-02  
[1053,] -2.913223e-02 -1.556361e-02  
[1054,] -2.888291e-02 -1.634276e-02  
[1055,] -2.871625e-02 -1.669351e-02  
[1056,] -2.855053e-02 -1.714904e-02  
[1057,] -2.840534e-02 -1.768630e-02  
[1058,] -2.830847e-02 -1.783052e-02  
[1059,] -2.822086e-02 -1.798576e-02  
[1060,] -2.807157e-02 -1.849527e-02  
[1061,] -2.785279e-02 -1.914673e-02  
[1062,] -2.754076e-02 -1.992861e-02  
[1063,] -2.720965e-02 -2.076286e-02  
[1064,] -2.694260e-02 -2.136411e-02  
[1065,] -2.677356e-02 -2.180683e-02  
[1066,] -2.654685e-02 -2.231190e-02  
[1067,] -2.619778e-02 -2.289225e-02  
[1068,] -2.584523e-02 -2.334984e-02  
[1069,] -2.566593e-02 -2.363798e-02  
[1070,] -2.560380e-02 -2.394031e-02  
[1071,] -2.541624e-02 -2.455069e-02  
[1072,] -2.503229e-02 -2.538845e-02  
[1073,] -2.448645e-02 -2.615565e-02  
[1074,] -2.380857e-02 -2.703657e-02  
[1075,] -2.332128e-02 -2.776264e-02  
[1076,] -2.317565e-02 -2.808777e-02  
[1077,] -2.281682e-02 -2.877396e-02  
[1078,] -2.216596e-02 -2.980472e-02  
[1079,] -2.174245e-02 -3.038318e-02  
[1080,] -2.126623e-02 -3.091029e-02  
[1081,] -2.027772e-02 -3.203619e-02  
[1082,] -1.914299e-02 -3.330797e-02  
[1083,] -1.822972e-02 -3.413015e-02  
[1084,] -1.756693e-02 -3.466536e-02  
[1085,] -1.687607e-02 -3.516728e-02  
[1086,] -1.596757e-02 -3.578164e-02  
[1087,] -1.509696e-02 -3.636279e-02  
[1088,] -1.448158e-02 -3.652067e-02  
[1089,] -1.398399e-02 -3.664051e-02  
[1090,] -1.324938e-02 -3.700910e-02

---

---

[1091,] -1.246273e-02 -3.753833e-02  
[1092,] -1.180466e-02 -3.789299e-02  
[1093,] -1.110527e-02 -3.791567e-02  
[1094,] -1.017651e-02 -3.783721e-02  
[1095,] -9.134162e-03 -3.805768e-02  
[1096,] -8.282141e-03 -3.829228e-02  
[1097,] -7.442429e-03 -3.833634e-02  
[1098,] -6.529752e-03 -3.825837e-02  
[1099,] -5.813422e-03 -3.815009e-02  
[1100,] -5.238956e-03 -3.795906e-02  
[1101,] -4.801632e-03 -3.782901e-02  
[1102,] -4.361926e-03 -3.792580e-02  
[1103,] -3.731671e-03 -3.804181e-02  
[1104,] -3.041015e-03 -3.769166e-02  
[1105,] -2.408468e-03 -3.710816e-02  
[1106,] -1.967716e-03 -3.655021e-02  
[1107,] -1.805668e-03 -3.616485e-02  
[1108,] -1.633612e-03 -3.598506e-02  
[1109,] -1.237701e-03 -3.583108e-02  
[1110,] -6.792793e-04 -3.561076e-02  
[1111,] -1.433380e-05 -3.537533e-02  
[1112,] 5.105803e-04 -3.522423e-02  
[1113,] 7.297315e-04 -3.502463e-02  
[1114,] 9.781512e-04 -3.461894e-02  
[1115,] 1.383101e-03 -3.377200e-02  
[1116,] 1.681476e-03 -3.292753e-02  
[1117,] 2.011052e-03 -3.261294e-02  
[1118,] 2.706837e-03 -3.247978e-02  
[1119,] 3.583029e-03 -3.200381e-02  
[1120,] 4.236405e-03 -3.152471e-02  
[1121,] 4.537815e-03 -3.138413e-02  
[1122,] 4.598160e-03 -3.131230e-02  
[1123,] 4.545257e-03 -3.107750e-02  
[1124,] 4.580084e-03 -3.082776e-02  
[1125,] 4.760627e-03 -3.060029e-02  
[1126,] 4.936229e-03 -3.034276e-02  
[1127,] 5.155365e-03 -2.992530e-02  
[1128,] 5.522876e-03 -2.925854e-02  
[1129,] 6.044411e-03 -2.895110e-02  
[1130,] 6.432454e-03 -2.928242e-02  
[1131,] 6.449808e-03 -2.973166e-02  
[1132,] 6.386193e-03 -2.999095e-02

---

---

[1133,] 6.469459e-03 -2.977525e-02  
[1134,] 6.717833e-03 -2.905416e-02  
[1135,] 6.870481e-03 -2.842220e-02  
[1136,] 6.987002e-03 -2.835667e-02  
[1137,] 7.524576e-03 -2.851339e-02  
[1138,] 7.939074e-03 -2.829346e-02  
[1139,] 7.737654e-03 -2.762862e-02  
[1140,] 7.660768e-03 -2.722011e-02  
[1141,] 8.064614e-03 -2.731812e-02  
[1142,] 8.391310e-03 -2.724491e-02  
[1143,] 8.374259e-03 -2.693812e-02  
[1144,] 8.516893e-03 -2.672040e-02  
[1145,] 9.074216e-03 -2.655742e-02  
[1146,] 9.384112e-03 -2.626685e-02  
[1147,] 9.054253e-03 -2.598563e-02  
[1148,] 8.696728e-03 -2.596591e-02  
[1149,] 8.770587e-03 -2.590325e-02  
[1150,] 8.837174e-03 -2.574527e-02  
[1151,] 8.653360e-03 -2.559177e-02  
[1152,] 8.776056e-03 -2.517177e-02  
[1153,] 9.106096e-03 -2.466817e-02  
[1154,] 8.905266e-03 -2.461345e-02  
[1155,] 8.480798e-03 -2.504289e-02  
[1156,] 8.745024e-03 -2.570825e-02  
[1157,] 9.648196e-03 -2.615982e-02  
[1158,] 1.039838e-02 -2.607033e-02  
[1159,] 1.051494e-02 -2.569412e-02  
[1160,] 1.019121e-02 -2.547689e-02  
[1161,] 9.812640e-03 -2.528892e-02  
[1162,] 9.678652e-03 -2.512038e-02  
[1163,] 9.795406e-03 -2.537491e-02  
[1164,] 9.745333e-03 -2.590410e-02  
[1165,] 9.362598e-03 -2.604819e-02  
[1166,] 9.119174e-03 -2.568092e-02  
[1167,] 9.385546e-03 -2.538771e-02  
[1168,] 9.834511e-03 -2.524396e-02  
[1169,] 9.983624e-03 -2.507705e-02  
[1170,] 9.709798e-03 -2.500695e-02  
[1171,] 9.562590e-03 -2.514067e-02  
[1172,] 9.945532e-03 -2.543683e-02  
[1173,] 1.009632e-02 -2.572761e-02  
[1174,] 9.653250e-03 -2.606389e-02

---

---

[1175,] 9.366009e-03 -2.638916e-02  
[1176,] 9.489722e-03 -2.663632e-02  
[1177,] 9.660143e-03 -2.681898e-02  
[1178,] 9.661030e-03 -2.669050e-02  
[1179,] 9.517807e-03 -2.660825e-02  
[1180,] 9.580646e-03 -2.702853e-02  
[1181,] 9.735248e-03 -2.724796e-02  
[1182,] 9.397421e-03 -2.701489e-02  
[1183,] 9.075332e-03 -2.689578e-02  
[1184,] 9.399383e-03 -2.683430e-02  
[1185,] 9.821952e-03 -2.692234e-02  
[1186,] 9.839839e-03 -2.722192e-02  
[1187,] 9.837147e-03 -2.728932e-02  
[1188,] 9.839255e-03 -2.710505e-02  
[1189,] 9.471708e-03 -2.717958e-02  
[1190,] 8.999117e-03 -2.760288e-02  
[1191,] 8.658330e-03 -2.799533e-02  
[1192,] 8.696942e-03 -2.812554e-02  
[1193,] 9.090858e-03 -2.788365e-02  
[1194,] 9.343457e-03 -2.752100e-02  
[1195,] 9.328716e-03 -2.779880e-02  
[1196,] 8.937004e-03 -2.859802e-02  
[1197,] 8.202841e-03 -2.926665e-02  
[1198,] 7.715080e-03 -2.970947e-02  
[1199,] 7.812098e-03 -2.986700e-02  
[1200,] 7.939838e-03 -2.988559e-02  
[1201,] 7.872502e-03 -3.008072e-02  
[1202,] 7.876986e-03 -3.050798e-02  
[1203,] 7.789640e-03 -3.099942e-02  
[1204,] 7.458009e-03 -3.111356e-02  
[1205,] 7.189373e-03 -3.092913e-02  
[1206,] 7.224416e-03 -3.090971e-02  
[1207,] 7.312786e-03 -3.123381e-02  
[1208,] 7.118199e-03 -3.166854e-02  
[1209,] 6.670268e-03 -3.202795e-02  
[1210,] 6.392039e-03 -3.217370e-02  
[1211,] 6.655203e-03 -3.199932e-02  
[1212,] 6.977331e-03 -3.176392e-02  
[1213,] 6.861652e-03 -3.193394e-02  
[1214,] 6.835001e-03 -3.246903e-02  
[1215,] 7.252742e-03 -3.286804e-02  
[1216,] 7.408870e-03 -3.301640e-02

---

---

[1217,] 6.925829e-03 -3.322784e-02  
[1218,] 6.440713e-03 -3.368276e-02  
[1219,] 6.257174e-03 -3.416181e-02  
[1220,] 5.929576e-03 -3.429662e-02  
[1221,] 5.400435e-03 -3.420458e-02  
[1222,] 4.922665e-03 -3.437145e-02  
[1223,] 4.601748e-03 -3.485303e-02  
[1224,] 4.723501e-03 -3.531745e-02  
[1225,] 5.015697e-03 -3.578627e-02  
[1226,] 4.825713e-03 -3.640307e-02  
[1227,] 4.467107e-03 -3.676987e-02  
[1228,] 4.220309e-03 -3.670149e-02  
[1229,] 3.933259e-03 -3.674888e-02  
[1230,] 3.819026e-03 -3.690238e-02  
[1231,] 3.863819e-03 -3.695520e-02  
[1232,] 3.546511e-03 -3.718940e-02  
[1233,] 2.925889e-03 -3.758158e-02  
[1234,] 2.636558e-03 -3.796591e-02  
[1235,] 2.686457e-03 -3.809879e-02  
[1236,] 2.736741e-03 -3.792544e-02  
[1237,] 2.729612e-03 -3.739629e-02  
[1238,] 2.583671e-03 -3.723980e-02  
[1239,] 2.151767e-03 -3.778064e-02  
[1240,] 1.582187e-03 -3.843914e-02  
[1241,] 1.355778e-03 -3.879985e-02  
[1242,] 1.484164e-03 -3.887860e-02  
[1243,] 1.370682e-03 -3.897677e-02  
[1244,] 1.011320e-03 -3.930191e-02  
[1245,] 8.912621e-04 -3.949231e-02  
[1246,] 9.284108e-04 -3.959090e-02  
[1247,] 9.475804e-04 -3.956317e-02  
[1248,] 9.906133e-04 -3.938326e-02  
[1249,] 9.597439e-04 -3.918187e-02  
[1250,] 7.266261e-04 -3.921279e-02  
[1251,] 1.670970e-04 -3.944156e-02  
[1252,] -6.849205e-04 -3.986811e-02  
[1253,] -1.131320e-03 -4.021039e-02  
[1254,] -8.405134e-04 -4.016425e-02  
[1255,] -5.159359e-04 -3.998831e-02  
[1256,] -4.673633e-04 -4.013584e-02  
[1257,] -4.710476e-04 -4.047747e-02  
[1258,] -5.886816e-04 -4.073194e-02

---

---

[1259,] -9.897994e-04 -4.088039e-02  
[1260,] -1.602345e-03 -4.104258e-02  
[1261,] -2.033314e-03 -4.122498e-02  
[1262,] -2.046020e-03 -4.130021e-02  
[1263,] -1.954877e-03 -4.138802e-02  
[1264,] -2.036300e-03 -4.145299e-02  
[1265,] -2.274602e-03 -4.155261e-02  
[1266,] -2.708013e-03 -4.161584e-02  
[1267,] -3.091513e-03 -4.148984e-02  
[1268,] -3.098185e-03 -4.130159e-02  
[1269,] -2.840729e-03 -4.117252e-02  
[1270,] -2.499748e-03 -4.119714e-02  
[1271,] -2.179456e-03 -4.139207e-02  
[1272,] -2.178854e-03 -4.157091e-02  
[1273,] -2.704143e-03 -4.164273e-02  
[1274,] -3.432471e-03 -4.167792e-02  
[1275,] -3.749702e-03 -4.168484e-02  
[1276,] -3.611463e-03 -4.160704e-02  
[1277,] -3.728695e-03 -4.161245e-02  
[1278,] -4.304195e-03 -4.170550e-02  
[1279,] -4.777452e-03 -4.178240e-02  
[1280,] -4.909680e-03 -4.177864e-02  
[1281,] -5.069388e-03 -4.164813e-02  
[1282,] -5.459981e-03 -4.161823e-02  
[1283,] -5.691189e-03 -4.168819e-02  
[1284,] -5.497060e-03 -4.165195e-02  
[1285,] -5.553842e-03 -4.151264e-02  
[1286,] -6.292900e-03 -4.134400e-02  
[1287,] -6.717286e-03 -4.136724e-02  
[1288,] -6.470241e-03 -4.143951e-02  
[1289,] -6.169878e-03 -4.130345e-02  
[1290,] -5.950777e-03 -4.143260e-02  
[1291,] -6.001274e-03 -4.165444e-02  
[1292,] -6.486713e-03 -4.160594e-02  
[1293,] -7.186531e-03 -4.132017e-02  
[1294,] -7.795829e-03 -4.106914e-02  
[1295,] -8.050096e-03 -4.107709e-02  
[1296,] -8.159723e-03 -4.115809e-02  
[1297,] -8.295782e-03 -4.110470e-02  
[1298,] -8.366841e-03 -4.117369e-02  
[1299,] -8.415275e-03 -4.119173e-02  
[1300,] -8.487570e-03 -4.109173e-02

---

---

[1301,] -8.509115e-03 -4.091825e-02  
[1302,] -8.653232e-03 -4.091174e-02  
[1303,] -9.082617e-03 -4.079595e-02  
[1304,] -9.555265e-03 -4.051841e-02  
[1305,] -9.609905e-03 -4.049979e-02  
[1306,] -9.348561e-03 -4.068761e-02  
[1307,] -9.310932e-03 -4.066764e-02  
[1308,] -9.474846e-03 -4.056276e-02  
[1309,] -9.501691e-03 -4.056862e-02  
[1310,] -9.545286e-03 -4.050786e-02  
[1311,] -1.002006e-02 -4.018350e-02  
[1312,] -1.068495e-02 -3.981258e-02  
[1313,] -1.084775e-02 -3.973536e-02  
[1314,] -1.053118e-02 -3.988266e-02  
[1315,] -1.024309e-02 -4.001203e-02  
[1316,] -1.012535e-02 -3.992998e-02  
[1317,] -1.010902e-02 -3.977066e-02  
[1318,] -1.008184e-02 -3.979776e-02  
[1319,] -1.018085e-02 -3.994606e-02  
[1320,] -1.065078e-02 -3.990958e-02  
[1321,] -1.114209e-02 -3.966346e-02  
[1322,] -1.126639e-02 -3.945992e-02  
[1323,] -1.123712e-02 -3.928393e-02  
[1324,] -1.130118e-02 -3.917758e-02  
[1325,] -1.148676e-02 -3.911214e-02  
[1326,] -1.191303e-02 -3.880819e-02  
[1327,] -1.249557e-02 -3.837148e-02  
[1328,] -1.291113e-02 -3.806143e-02  
[1329,] -1.297026e-02 -3.795782e-02  
[1330,] -1.272324e-02 -3.803675e-02  
[1331,] -1.264672e-02 -3.814679e-02  
[1332,] -1.291036e-02 -3.809794e-02  
[1333,] -1.299504e-02 -3.802519e-02  
[1334,] -1.280204e-02 -3.811295e-02  
[1335,] -1.258432e-02 -3.828881e-02  
[1336,] -1.240307e-02 -3.828344e-02  
[1337,] -1.256279e-02 -3.795124e-02  
[1338,] -1.303936e-02 -3.751135e-02  
[1339,] -1.342619e-02 -3.719293e-02  
[1340,] -1.351390e-02 -3.712151e-02  
[1341,] -1.335893e-02 -3.712767e-02  
[1342,] -1.321295e-02 -3.712256e-02

---



---

[1343,] -1.313970e-02 -3.719847e-02  
[1344,] -1.309290e-02 -3.725006e-02  
[1345,] -1.316428e-02 -3.698060e-02  
[1346,] -1.347509e-02 -3.652296e-02  
[1347,] -1.385514e-02 -3.616384e-02  
[1348,] -1.412540e-02 -3.602012e-02  
[1349,] -1.425875e-02 -3.622474e-02  
[1350,] -1.424792e-02 -3.655806e-02  
[1351,] -1.428249e-02 -3.651711e-02  
[1352,] -1.449159e-02 -3.617036e-02  
[1353,] -1.468466e-02 -3.579732e-02  
[1354,] -1.484610e-02 -3.544287e-02  
[1355,] -1.512849e-02 -3.508712e-02  
[1356,] -1.525569e-02 -3.498112e-02  
[1357,] -1.507222e-02 -3.509014e-02  
[1358,] -1.492387e-02 -3.512295e-02  
[1359,] -1.491855e-02 -3.510866e-02  
[1360,] -1.484473e-02 -3.511566e-02  
[1361,] -1.469465e-02 -3.514042e-02  
[1362,] -1.478093e-02 -3.490889e-02  
[1363,] -1.517952e-02 -3.454337e-02  
[1364,] -1.561720e-02 -3.436290e-02  
[1365,] -1.597635e-02 -3.429284e-02  
[1366,] -1.603827e-02 -3.415637e-02  
[1367,] -1.582443e-02 -3.403265e-02  
[1368,] -1.582404e-02 -3.397915e-02  
[1369,] -1.600526e-02 -3.394908e-02  
[1370,] -1.602319e-02 -3.405752e-02  
[1371,] -1.597160e-02 -3.402627e-02  
[1372,] -1.609798e-02 -3.362224e-02  
[1373,] -1.634783e-02 -3.327303e-02  
[1374,] -1.650006e-02 -3.326956e-02  
[1375,] -1.650256e-02 -3.339189e-02  
[1376,] -1.644699e-02 -3.344735e-02  
[1377,] -1.643235e-02 -3.344779e-02  
[1378,] -1.652089e-02 -3.329361e-02  
[1379,] -1.660312e-02 -3.301523e-02  
[1380,] -1.665816e-02 -3.283810e-02  
[1381,] -1.688161e-02 -3.258036e-02  
[1382,] -1.722970e-02 -3.203453e-02  
[1383,] -1.746168e-02 -3.150354e-02  
[1384,] -1.743936e-02 -3.153920e-02

---

---

[1385,] -1.730701e-02 -3.217806e-02  
[1386,] -1.730707e-02 -3.254263e-02  
[1387,] -1.724466e-02 -3.238938e-02  
[1388,] -1.691783e-02 -3.218577e-02  
[1389,] -1.685012e-02 -3.193678e-02  
[1390,] -1.709473e-02 -3.177599e-02  
[1391,] -1.710746e-02 -3.188265e-02  
[1392,] -1.692801e-02 -3.193050e-02  
[1393,] -1.671568e-02 -3.202707e-02  
[1394,] -1.637906e-02 -3.224497e-02  
[1395,] -1.629741e-02 -3.220867e-02  
[1396,] -1.648901e-02 -3.191774e-02  
[1397,] -1.654017e-02 -3.180796e-02  
[1398,] -1.662654e-02 -3.184886e-02  
[1399,] -1.683695e-02 -3.170212e-02  
[1400,] -1.696994e-02 -3.134406e-02  
[1401,] -1.688562e-02 -3.107590e-02  
[1402,] -1.656323e-02 -3.113156e-02  
[1403,] -1.634449e-02 -3.128894e-02  
[1404,] -1.618314e-02 -3.158672e-02  
[1405,] -1.585644e-02 -3.203982e-02  
[1406,] -1.587063e-02 -3.217979e-02  
[1407,] -1.633680e-02 -3.179107e-02  
[1408,] -1.661283e-02 -3.148960e-02  
[1409,] -1.649994e-02 -3.150034e-02  
[1410,] -1.629593e-02 -3.148096e-02  
[1411,] -1.616839e-02 -3.146373e-02  
[1412,] -1.626698e-02 -3.129970e-02  
[1413,] -1.648522e-02 -3.107403e-02  
[1414,] -1.627000e-02 -3.121843e-02  
[1415,] -1.568229e-02 -3.160357e-02  
[1416,] -1.539991e-02 -3.169837e-02  
[1417,] -1.556772e-02 -3.147633e-02  
[1418,] -1.571842e-02 -3.137541e-02  
[1419,] -1.560500e-02 -3.157633e-02  
[1420,] -1.560717e-02 -3.187049e-02  
[1421,] -1.601097e-02 -3.191513e-02  
[1422,] -1.635368e-02 -3.180310e-02  
[1423,] -1.613566e-02 -3.178097e-02  
[1424,] -1.557107e-02 -3.179111e-02  
[1425,] -1.515695e-02 -3.181075e-02  
[1426,] -1.508991e-02 -3.183583e-02

---

---

[1427,] -1.523099e-02 -3.171635e-02  
[1428,] -1.529791e-02 -3.155283e-02  
[1429,] -1.514330e-02 -3.165584e-02  
[1430,] -1.490115e-02 -3.205610e-02  
[1431,] -1.479844e-02 -3.231397e-02  
[1432,] -1.486067e-02 -3.216870e-02  
[1433,] -1.499545e-02 -3.192575e-02  
[1434,] -1.502938e-02 -3.193358e-02  
[1435,] -1.481795e-02 -3.208574e-02  
[1436,] -1.444973e-02 -3.204973e-02  
[1437,] -1.419353e-02 -3.191777e-02  
[1438,] -1.411171e-02 -3.195955e-02  
[1439,] -1.392556e-02 -3.209615e-02  
[1440,] -1.366289e-02 -3.220333e-02  
[1441,] -1.348294e-02 -3.239284e-02  
[1442,] -1.327030e-02 -3.272452e-02  
[1443,] -1.310846e-02 -3.286739e-02  
[1444,] -1.308207e-02 -3.287135e-02  
[1445,] -1.293470e-02 -3.299155e-02  
[1446,] -1.268258e-02 -3.324832e-02  
[1447,] -1.246074e-02 -3.349942e-02  
[1448,] -1.232523e-02 -3.347872e-02  
[1449,] -1.222314e-02 -3.323609e-02  
[1450,] -1.209927e-02 -3.296871e-02  
[1451,] -1.190904e-02 -3.280237e-02  
[1452,] -1.159168e-02 -3.301057e-02  
[1453,] -1.131380e-02 -3.344818e-02  
[1454,] -1.121097e-02 -3.369524e-02  
[1455,] -1.115939e-02 -3.368975e-02  
[1456,] -1.093450e-02 -3.370551e-02  
[1457,] -1.059564e-02 -3.394296e-02  
[1458,] -1.048431e-02 -3.418827e-02  
[1459,] -1.044858e-02 -3.431885e-02  
[1460,] -1.013883e-02 -3.438398e-02  
[1461,] -9.650251e-03 -3.437607e-02  
[1462,] -9.262256e-03 -3.447260e-02  
[1463,] -9.136817e-03 -3.466557e-02  
[1464,] -9.097455e-03 -3.481457e-02  
[1465,] -8.867995e-03 -3.493414e-02  
[1466,] -8.628189e-03 -3.501506e-02  
[1467,] -8.770027e-03 -3.512349e-02  
[1468,] -9.116860e-03 -3.528796e-02

---

---

[1469,] -9.129204e-03 -3.538730e-02  
[1470,] -8.714715e-03 -3.549749e-02  
[1471,] -8.213907e-03 -3.556377e-02  
[1472,] -8.008217e-03 -3.547777e-02  
[1473,] -8.033307e-03 -3.533969e-02  
[1474,] -7.876895e-03 -3.544241e-02  
[1475,] -7.562596e-03 -3.569343e-02  
[1476,] -7.413431e-03 -3.563253e-02  
[1477,] -7.199855e-03 -3.538350e-02  
[1478,] -6.680237e-03 -3.527622e-02  
[1479,] -6.302453e-03 -3.536698e-02  
[1480,] -6.233151e-03 -3.556294e-02  
[1481,] -6.010005e-03 -3.563895e-02  
[1482,] -5.621762e-03 -3.570276e-02  
[1483,] -5.389238e-03 -3.575191e-02  
[1484,] -5.383953e-03 -3.572733e-02  
[1485,] -5.623632e-03 -3.569379e-02  
[1486,] -5.996353e-03 -3.550046e-02  
[1487,] -6.190566e-03 -3.526425e-02  
[1488,] -6.186453e-03 -3.520455e-02  
[1489,] -6.160735e-03 -3.504045e-02  
[1490,] -5.906157e-03 -3.499130e-02  
[1491,] -5.254725e-03 -3.516665e-02  
[1492,] -4.761165e-03 -3.528336e-02  
[1493,] -4.883218e-03 -3.521556e-02  
[1494,] -5.184735e-03 -3.501199e-02  
[1495,] -5.154546e-03 -3.460310e-02  
[1496,] -4.952778e-03 -3.444775e-02  
[1497,] -5.005032e-03 -3.467789e-02  
[1498,] -5.397544e-03 -3.480532e-02  
[1499,] -5.562238e-03 -3.448121e-02  
[1500,] -5.203395e-03 -3.412756e-02  
[1501,] -5.074219e-03 -3.397817e-02  
[1502,] -5.564654e-03 -3.407720e-02  
[1503,] -5.846377e-03 -3.411160e-02  
[1504,] -5.595156e-03 -3.380065e-02  
[1505,] -5.412447e-03 -3.353928e-02  
[1506,] -5.397949e-03 -3.352030e-02  
[1507,] -5.191946e-03 -3.363577e-02  
[1508,] -4.969501e-03 -3.372908e-02  
[1509,] -5.179202e-03 -3.361816e-02  
[1510,] -5.605988e-03 -3.328930e-02

---

---

[1511,] -5.760961e-03 -3.302506e-02  
[1512,] -5.576187e-03 -3.289812e-02  
[1513,] -5.442449e-03 -3.279151e-02  
[1514,] -5.453816e-03 -3.257852e-02  
[1515,] -5.153705e-03 -3.229111e-02  
[1516,] -4.766811e-03 -3.215731e-02  
[1517,] -4.977629e-03 -3.208934e-02  
[1518,] -5.441351e-03 -3.201452e-02  
[1519,] -5.302817e-03 -3.222815e-02  
[1520,] -4.743893e-03 -3.261259e-02  
[1521,] -4.550774e-03 -3.276059e-02  
[1522,] -4.722332e-03 -3.259687e-02  
[1523,] -4.623944e-03 -3.229792e-02  
[1524,] -4.238948e-03 -3.207938e-02  
[1525,] -3.988266e-03 -3.194686e-02  
[1526,] -3.888334e-03 -3.180877e-02  
[1527,] -3.804186e-03 -3.187914e-02  
[1528,] -3.949081e-03 -3.237931e-02  
[1529,] -4.326633e-03 -3.277477e-02  
[1530,] -4.295287e-03 -3.287076e-02  
[1531,] -3.593837e-03 -3.309419e-02  
[1532,] -2.956666e-03 -3.348228e-02  
[1533,] -2.669847e-03 -3.382415e-02  
[1534,] -2.145316e-03 -3.380358e-02  
[1535,] -1.391101e-03 -3.351758e-02  
[1536,] -9.736618e-04 -3.325497e-02  
[1537,] -7.405487e-04 -3.309727e-02  
[1538,] -3.561204e-04 -3.319647e-02  
[1539,] 8.311213e-05 -3.361901e-02  
[1540,] 5.486207e-04 -3.389036e-02  
[1541,] 1.223881e-03 -3.395531e-02  
[1542,] 2.345761e-03 -3.401894e-02  
[1543,] 3.505334e-03 -3.386143e-02  
[1544,] 4.231981e-03 -3.345815e-02  
[1545,] 5.131243e-03 -3.322045e-02  
[1546,] 6.433158e-03 -3.317688e-02  
[1547,] 7.573511e-03 -3.302542e-02  
[1548,] 8.757131e-03 -3.261315e-02  
[1549,] 1.040868e-02 -3.200612e-02  
[1550,] 1.198513e-02 -3.133528e-02  
[1551,] 1.362731e-02 -3.030730e-02  
[1552,] 1.548590e-02 -2.863996e-02

---

---

[1553,] 1.700916e-02 -2.703701e-02  
[1554,] 1.862371e-02 -2.550028e-02  
[1555,] 2.032958e-02 -2.348698e-02  
[1556,] 2.210870e-02 -2.079945e-02  
[1557,] 2.400084e-02 -1.755828e-02  
[1558,] 2.546387e-02 -1.442125e-02  
[1559,] 2.657182e-02 -1.104035e-02  
[1560,] 2.774854e-02 -7.530837e-03  
[1561,] 2.874461e-02 -4.522461e-03  
[1562,] 2.920786e-02 -1.634344e-03  
[1563,] 2.933288e-02 1.201780e-03  
[1564,] 2.928523e-02 3.658838e-03  
[1565,] 2.904733e-02 6.303074e-03  
[1566,] 2.851439e-02 9.453096e-03  
[1567,] 2.776503e-02 1.211391e-02  
[1568,] 2.703541e-02 1.365137e-02  
[1569,] 2.634638e-02 1.461907e-02  
[1570,] 2.566810e-02 1.559847e-02  
[1571,] 2.501071e-02 1.666998e-02  
[1572,] 2.439023e-02 1.771636e-02  
[1573,] 2.378707e-02 1.863011e-02  
[1574,] 2.314083e-02 1.939830e-02  
[1575,] 2.249943e-02 2.003519e-02  
[1576,] 2.204143e-02 2.044470e-02  
[1577,] 2.183242e-02 2.068280e-02  
[1578,] 2.170468e-02 2.094432e-02  
[1579,] 2.155330e-02 2.120619e-02  
[1580,] 2.141147e-02 2.133670e-02  
[1581,] 2.128959e-02 2.145454e-02  
[1582,] 2.112141e-02 2.167400e-02  
[1583,] 2.083196e-02 2.183216e-02  
[1584,] 2.043883e-02 2.191251e-02  
[1585,] 2.006902e-02 2.214077e-02  
[1586,] 1.989485e-02 2.245320e-02  
[1587,] 1.996707e-02 2.253514e-02  
[1588,] 2.008839e-02 2.246396e-02  
[1589,] 2.011149e-02 2.248859e-02  
[1590,] 2.012029e-02 2.254733e-02  
[1591,] 2.018827e-02 2.268698e-02  
[1592,] 2.024668e-02 2.293207e-02  
[1593,] 2.018399e-02 2.302210e-02  
[1594,] 2.005091e-02 2.291524e-02

---

---

|         |              |              |
|---------|--------------|--------------|
| [1595,] | 2.006247e-02 | 2.283610e-02 |
| [1596,] | 2.019410e-02 | 2.269634e-02 |
| [1597,] | 2.025736e-02 | 2.250412e-02 |
| [1598,] | 2.022642e-02 | 2.253831e-02 |
| [1599,] | 2.030137e-02 | 2.271973e-02 |
| [1600,] | 2.051531e-02 | 2.269453e-02 |
| [1601,] | 2.064331e-02 | 2.251593e-02 |
| [1602,] | 2.065722e-02 | 2.252457e-02 |
| [1603,] | 2.076475e-02 | 2.269138e-02 |
| [1604,] | 2.096688e-02 | 2.269951e-02 |
| [1605,] | 2.113709e-02 | 2.252667e-02 |
| [1606,] | 2.121958e-02 | 2.244405e-02 |
| [1607,] | 2.124033e-02 | 2.253209e-02 |
| [1608,] | 2.131052e-02 | 2.270058e-02 |
| [1609,] | 2.147225e-02 | 2.278041e-02 |
| [1610,] | 2.168913e-02 | 2.257956e-02 |
| [1611,] | 2.195457e-02 | 2.219260e-02 |
| [1612,] | 2.223830e-02 | 2.189810e-02 |
| [1613,] | 2.238090e-02 | 2.191885e-02 |
| [1614,] | 2.241391e-02 | 2.211380e-02 |
| [1615,] | 2.248919e-02 | 2.215414e-02 |
| [1616,] | 2.258885e-02 | 2.202841e-02 |
| [1617,] | 2.274709e-02 | 2.184527e-02 |
| [1618,] | 2.295994e-02 | 2.168814e-02 |
| [1619,] | 2.315486e-02 | 2.176923e-02 |
| [1620,] | 2.332622e-02 | 2.206278e-02 |
| [1621,] | 2.353565e-02 | 2.211916e-02 |
| [1622,] | 2.384182e-02 | 2.174800e-02 |
| [1623,] | 2.409343e-02 | 2.133515e-02 |
| [1624,] | 2.418949e-02 | 2.115496e-02 |
| [1625,] | 2.429700e-02 | 2.103211e-02 |
| [1626,] | 2.452773e-02 | 2.088548e-02 |
| [1627,] | 2.477232e-02 | 2.088551e-02 |
| [1628,] | 2.493383e-02 | 2.105657e-02 |
| [1629,] | 2.504421e-02 | 2.116634e-02 |
| [1630,] | 2.517206e-02 | 2.099707e-02 |
| [1631,] | 2.535835e-02 | 2.063711e-02 |
| [1632,] | 2.553914e-02 | 2.040303e-02 |
| [1633,] | 2.567254e-02 | 2.047943e-02 |
| [1634,] | 2.583937e-02 | 2.059340e-02 |
| [1635,] | 2.605772e-02 | 2.035137e-02 |
| [1636,] | 2.627463e-02 | 1.981438e-02 |

---

---

|         |              |              |
|---------|--------------|--------------|
| [1637,] | 2.647044e-02 | 1.939666e-02 |
| [1638,] | 2.666330e-02 | 1.924191e-02 |
| [1639,] | 2.692377e-02 | 1.895446e-02 |
| [1640,] | 2.723248e-02 | 1.843614e-02 |
| [1641,] | 2.742323e-02 | 1.819211e-02 |
| [1642,] | 2.743609e-02 | 1.834751e-02 |
| [1643,] | 2.738827e-02 | 1.850846e-02 |
| [1644,] | 2.739311e-02 | 1.846604e-02 |
| [1645,] | 2.752504e-02 | 1.826576e-02 |
| [1646,] | 2.775635e-02 | 1.807540e-02 |
| [1647,] | 2.793065e-02 | 1.800608e-02 |
| [1648,] | 2.810101e-02 | 1.788167e-02 |
| [1649,] | 2.831780e-02 | 1.759082e-02 |
| [1650,] | 2.848521e-02 | 1.733119e-02 |
| [1651,] | 2.851548e-02 | 1.729130e-02 |
| [1652,] | 2.852721e-02 | 1.738666e-02 |
| [1653,] | 2.859751e-02 | 1.733953e-02 |
| [1654,] | 2.863712e-02 | 1.722807e-02 |
| [1655,] | 2.864346e-02 | 1.711600e-02 |
| [1656,] | 2.875115e-02 | 1.672172e-02 |
| [1657,] | 2.893622e-02 | 1.625277e-02 |
| [1658,] | 2.904177e-02 | 1.609280e-02 |
| [1659,] | 2.908704e-02 | 1.614532e-02 |
| [1660,] | 2.911113e-02 | 1.621524e-02 |
| [1661,] | 2.913375e-02 | 1.612898e-02 |
| [1662,] | 2.919162e-02 | 1.571190e-02 |
| [1663,] | 2.926041e-02 | 1.534326e-02 |
| [1664,] | 2.929134e-02 | 1.533334e-02 |
| [1665,] | 2.930589e-02 | 1.529137e-02 |
| [1666,] | 2.935258e-02 | 1.511285e-02 |
| [1667,] | 2.936318e-02 | 1.508571e-02 |
| [1668,] | 2.937218e-02 | 1.511753e-02 |
| [1669,] | 2.942922e-02 | 1.494780e-02 |
| [1670,] | 2.947288e-02 | 1.470598e-02 |
| [1671,] | 2.948338e-02 | 1.460390e-02 |
| [1672,] | 2.951840e-02 | 1.453490e-02 |
| [1673,] | 2.956901e-02 | 1.440718e-02 |
| [1674,] | 2.953446e-02 | 1.426815e-02 |
| [1675,] | 2.941795e-02 | 1.419829e-02 |
| [1676,] | 2.938909e-02 | 1.403102e-02 |
| [1677,] | 2.949424e-02 | 1.356783e-02 |
| [1678,] | 2.957048e-02 | 1.305649e-02 |

---



---

|         |              |              |
|---------|--------------|--------------|
| [1679,] | 2.956166e-02 | 1.289738e-02 |
| [1680,] | 2.947119e-02 | 1.317020e-02 |
| [1681,] | 2.931294e-02 | 1.363920e-02 |
| [1682,] | 2.916487e-02 | 1.396637e-02 |
| [1683,] | 2.906753e-02 | 1.405357e-02 |
| [1684,] | 2.902118e-02 | 1.390724e-02 |
| [1685,] | 2.903295e-02 | 1.358991e-02 |
| [1686,] | 2.907198e-02 | 1.335575e-02 |
| [1687,] | 2.910105e-02 | 1.325241e-02 |
| [1688,] | 2.906766e-02 | 1.308235e-02 |
| [1689,] | 2.894298e-02 | 1.299275e-02 |
| [1690,] | 2.881800e-02 | 1.305632e-02 |
| [1691,] | 2.879029e-02 | 1.298065e-02 |
| [1692,] | 2.883463e-02 | 1.268628e-02 |
| [1693,] | 2.877933e-02 | 1.247956e-02 |
| [1694,] | 2.859869e-02 | 1.247599e-02 |
| [1695,] | 2.840689e-02 | 1.245052e-02 |
| [1696,] | 2.822829e-02 | 1.245400e-02 |
| [1697,] | 2.807920e-02 | 1.262397e-02 |
| [1698,] | 2.806304e-02 | 1.261293e-02 |
| [1699,] | 2.817733e-02 | 1.206382e-02 |
| [1700,] | 2.827618e-02 | 1.124511e-02 |
| [1701,] | 2.829069e-02 | 1.072295e-02 |
| [1702,] | 2.816805e-02 | 1.078225e-02 |
| [1703,] | 2.798358e-02 | 1.115776e-02 |
| [1704,] | 2.772416e-02 | 1.160480e-02 |
| [1705,] | 2.752405e-02 | 1.208123e-02 |
| [1706,] | 2.756973e-02 | 1.223115e-02 |
| [1707,] | 2.760000e-02 | 1.198678e-02 |
| [1708,] | 2.742697e-02 | 1.162692e-02 |
| [1709,] | 2.715568e-02 | 1.135916e-02 |
| [1710,] | 2.690144e-02 | 1.128627e-02 |
| [1711,] | 2.676650e-02 | 1.130993e-02 |
| [1712,] | 2.679818e-02 | 1.132175e-02 |
| [1713,] | 2.693863e-02 | 1.145909e-02 |
| [1714,] | 2.688437e-02 | 1.155823e-02 |
| [1715,] | 2.659214e-02 | 1.132931e-02 |
| [1716,] | 2.626520e-02 | 1.121728e-02 |
| [1717,] | 2.606316e-02 | 1.144260e-02 |
| [1718,] | 2.606502e-02 | 1.136947e-02 |
| [1719,] | 2.625710e-02 | 1.075234e-02 |
| [1720,] | 2.637948e-02 | 1.020546e-02 |

---

---

|         |              |              |
|---------|--------------|--------------|
| [1721,] | 2.627382e-02 | 1.014540e-02 |
| [1722,] | 2.606029e-02 | 1.013973e-02 |
| [1723,] | 2.588894e-02 | 9.855508e-03 |
| [1724,] | 2.581308e-02 | 9.603250e-03 |
| [1725,] | 2.571925e-02 | 9.414844e-03 |
| [1726,] | 2.555787e-02 | 9.106482e-03 |
| [1727,] | 2.547104e-02 | 8.936967e-03 |
| [1728,] | 2.547297e-02 | 9.183660e-03 |
| [1729,] | 2.542796e-02 | 9.549576e-03 |
| [1730,] | 2.529551e-02 | 9.566106e-03 |
| [1731,] | 2.515112e-02 | 9.187851e-03 |
| [1732,] | 2.495984e-02 | 8.869262e-03 |
| [1733,] | 2.468097e-02 | 8.901289e-03 |
| [1734,] | 2.446275e-02 | 9.004454e-03 |
| [1735,] | 2.429895e-02 | 8.873802e-03 |
| [1736,] | 2.406118e-02 | 8.654477e-03 |
| [1737,] | 2.377892e-02 | 8.517401e-03 |
| [1738,] | 2.364303e-02 | 8.499417e-03 |
| [1739,] | 2.361860e-02 | 8.587514e-03 |
| [1740,] | 2.352506e-02 | 8.648254e-03 |
| [1741,] | 2.333948e-02 | 8.778589e-03 |
| [1742,] | 2.313521e-02 | 9.020622e-03 |
| [1743,] | 2.291434e-02 | 9.221987e-03 |
| [1744,] | 2.274618e-02 | 9.351204e-03 |
| [1745,] | 2.275629e-02 | 9.170540e-03 |
| [1746,] | 2.288409e-02 | 8.581068e-03 |
| [1747,] | 2.294073e-02 | 8.028443e-03 |
| [1748,] | 2.287652e-02 | 7.743825e-03 |
| [1749,] | 2.279587e-02 | 7.445832e-03 |
| [1750,] | 2.269080e-02 | 6.897286e-03 |
| [1751,] | 2.255727e-02 | 6.455304e-03 |
| [1752,] | 2.244590e-02 | 6.690911e-03 |
| [1753,] | 2.225864e-02 | 7.403291e-03 |
| [1754,] | 2.206672e-02 | 7.888469e-03 |
| [1755,] | 2.197645e-02 | 7.834325e-03 |
| [1756,] | 2.188841e-02 | 7.447349e-03 |
| [1757,] | 2.184584e-02 | 7.131238e-03 |
| [1758,] | 2.180374e-02 | 7.200731e-03 |
| [1759,] | 2.169912e-02 | 7.570566e-03 |
| [1760,] | 2.162861e-02 | 7.717613e-03 |
| [1761,] | 2.168351e-02 | 7.449761e-03 |
| [1762,] | 2.187828e-02 | 7.146643e-03 |

---

---

|         |              |              |
|---------|--------------|--------------|
| [1763,] | 2.201675e-02 | 7.227930e-03 |
| [1764,] | 2.186830e-02 | 7.834035e-03 |
| [1765,] | 2.166496e-02 | 8.591131e-03 |
| [1766,] | 2.172373e-02 | 8.847564e-03 |
| [1767,] | 2.183970e-02 | 8.687431e-03 |
| [1768,] | 2.179893e-02 | 8.651362e-03 |
| [1769,] | 2.173746e-02 | 8.779177e-03 |
| [1770,] | 2.176019e-02 | 8.894541e-03 |
| [1771,] | 2.192834e-02 | 9.010542e-03 |
| [1772,] | 2.220591e-02 | 9.194326e-03 |
| [1773,] | 2.250374e-02 | 9.381954e-03 |
| [1774,] | 2.271041e-02 | 9.490526e-03 |
| [1775,] | 2.272682e-02 | 9.693621e-03 |
| [1776,] | 2.271917e-02 | 1.013774e-02 |
| [1777,] | 2.287946e-02 | 1.059916e-02 |
| [1778,] | 2.306520e-02 | 1.086690e-02 |
| [1779,] | 2.308492e-02 | 1.110305e-02 |
| [1780,] | 2.300203e-02 | 1.149510e-02 |
| [1781,] | 2.295400e-02 | 1.193789e-02 |
| [1782,] | 2.293853e-02 | 1.229377e-02 |
| [1783,] | 2.290516e-02 | 1.267234e-02 |
| [1784,] | 2.285615e-02 | 1.310064e-02 |
| [1785,] | 2.290614e-02 | 1.333509e-02 |
| [1786,] | 2.300719e-02 | 1.339958e-02 |
| [1787,] | 2.299203e-02 | 1.368485e-02 |
| [1788,] | 2.298074e-02 | 1.417068e-02 |
| [1789,] | 2.319531e-02 | 1.447382e-02 |
| [1790,] | 2.349137e-02 | 1.461069e-02 |
| [1791,] | 2.353268e-02 | 1.483278e-02 |
| [1792,] | 2.337220e-02 | 1.506059e-02 |
| [1793,] | 2.331042e-02 | 1.514210e-02 |
| [1794,] | 2.343975e-02 | 1.515267e-02 |
| [1795,] | 2.363776e-02 | 1.524227e-02 |
| [1796,] | 2.375814e-02 | 1.539156e-02 |
| [1797,] | 2.380226e-02 | 1.547102e-02 |
| [1798,] | 2.378643e-02 | 1.567059e-02 |
| [1799,] | 2.378402e-02 | 1.625932e-02 |
| [1800,] | 2.381455e-02 | 1.702910e-02 |
| [1801,] | 2.374098e-02 | 1.760240e-02 |
| [1802,] | 2.366212e-02 | 1.792806e-02 |
| [1803,] | 2.375836e-02 | 1.813770e-02 |
| [1804,] | 2.396586e-02 | 1.837162e-02 |

---

---

|         |              |              |
|---------|--------------|--------------|
| [1805,] | 2.413491e-02 | 1.860310e-02 |
| [1806,] | 2.436222e-02 | 1.846769e-02 |
| [1807,] | 2.467367e-02 | 1.797595e-02 |
| [1808,] | 2.478137e-02 | 1.783666e-02 |
| [1809,] | 2.463576e-02 | 1.815289e-02 |
| [1810,] | 2.457308e-02 | 1.846046e-02 |
| [1811,] | 2.456643e-02 | 1.877728e-02 |
| [1812,] | 2.444561e-02 | 1.925683e-02 |
| [1813,] | 2.437123e-02 | 1.975145e-02 |
| [1814,] | 2.447198e-02 | 2.002966e-02 |
| [1815,] | 2.457788e-02 | 2.014206e-02 |
| [1816,] | 2.453804e-02 | 2.029568e-02 |
| [1817,] | 2.446820e-02 | 2.051213e-02 |
| [1818,] | 2.453107e-02 | 2.070066e-02 |
| [1819,] | 2.462928e-02 | 2.089983e-02 |
| [1820,] | 2.457653e-02 | 2.121137e-02 |
| [1821,] | 2.446987e-02 | 2.154452e-02 |
| [1822,] | 2.451134e-02 | 2.171550e-02 |
| [1823,] | 2.467723e-02 | 2.171204e-02 |
| [1824,] | 2.483508e-02 | 2.158638e-02 |
| [1825,] | 2.495026e-02 | 2.151715e-02 |
| [1826,] | 2.498175e-02 | 2.164404e-02 |
| [1827,] | 2.490504e-02 | 2.181943e-02 |
| [1828,] | 2.481365e-02 | 2.191843e-02 |
| [1829,] | 2.471748e-02 | 2.214162e-02 |
| [1830,] | 2.458433e-02 | 2.251047e-02 |
| [1831,] | 2.449860e-02 | 2.277632e-02 |
| [1832,] | 2.455397e-02 | 2.288782e-02 |
| [1833,] | 2.466496e-02 | 2.294800e-02 |
| [1834,] | 2.471135e-02 | 2.301594e-02 |
| [1835,] | 2.468085e-02 | 2.316614e-02 |
| [1836,] | 2.462038e-02 | 2.341683e-02 |
| [1837,] | 2.457209e-02 | 2.365076e-02 |
| [1838,] | 2.459942e-02 | 2.372907e-02 |
| [1839,] | 2.474043e-02 | 2.362491e-02 |
| [1840,] | 2.490649e-02 | 2.352287e-02 |
| [1841,] | 2.494256e-02 | 2.359037e-02 |
| [1842,] | 2.484706e-02 | 2.375098e-02 |
| [1843,] | 2.473252e-02 | 2.389534e-02 |
| [1844,] | 2.468161e-02 | 2.407129e-02 |
| [1845,] | 2.471621e-02 | 2.426739e-02 |
| [1846,] | 2.474733e-02 | 2.445667e-02 |

---

---

|         |              |              |
|---------|--------------|--------------|
| [1847,] | 2.468174e-02 | 2.469108e-02 |
| [1848,] | 2.459170e-02 | 2.490815e-02 |
| [1849,] | 2.458495e-02 | 2.494935e-02 |
| [1850,] | 2.465462e-02 | 2.478169e-02 |
| [1851,] | 2.467212e-02 | 2.467578e-02 |
| [1852,] | 2.458722e-02 | 2.479726e-02 |
| [1853,] | 2.448827e-02 | 2.502168e-02 |
| [1854,] | 2.430960e-02 | 2.545258e-02 |
| [1855,] | 2.403939e-02 | 2.603925e-02 |
| [1856,] | 2.387922e-02 | 2.647148e-02 |
| [1857,] | 2.388651e-02 | 2.664248e-02 |
| [1858,] | 2.403991e-02 | 2.654939e-02 |
| [1859,] | 2.410907e-02 | 2.650478e-02 |
| [1860,] | 2.391064e-02 | 2.677731e-02 |
| [1861,] | 2.369119e-02 | 2.711365e-02 |
| [1862,] | 2.361800e-02 | 2.728621e-02 |
| [1863,] | 2.360640e-02 | 2.735163e-02 |
| [1864,] | 2.360578e-02 | 2.740713e-02 |
| [1865,] | 2.356590e-02 | 2.750002e-02 |
| [1866,] | 2.351469e-02 | 2.758976e-02 |
| [1867,] | 2.346588e-02 | 2.762216e-02 |
| [1868,] | 2.335701e-02 | 2.764867e-02 |
| [1869,] | 2.325228e-02 | 2.772846e-02 |
| [1870,] | 2.319792e-02 | 2.789401e-02 |
| [1871,] | 2.307020e-02 | 2.817261e-02 |
| [1872,] | 2.280823e-02 | 2.848498e-02 |
| [1873,] | 2.259343e-02 | 2.865489e-02 |
| [1874,] | 2.253646e-02 | 2.869177e-02 |
| [1875,] | 2.249426e-02 | 2.875840e-02 |
| [1876,] | 2.240233e-02 | 2.887250e-02 |
| [1877,] | 2.232024e-02 | 2.895343e-02 |
| [1878,] | 2.226614e-02 | 2.898108e-02 |
| [1879,] | 2.215426e-02 | 2.903166e-02 |
| [1880,] | 2.195290e-02 | 2.916747e-02 |
| [1881,] | 2.184576e-02 | 2.925356e-02 |
| [1882,] | 2.188910e-02 | 2.922155e-02 |
| [1883,] | 2.187461e-02 | 2.920049e-02 |
| [1884,] | 2.179267e-02 | 2.918976e-02 |
| [1885,] | 2.178995e-02 | 2.907173e-02 |
| [1886,] | 2.181044e-02 | 2.896669e-02 |
| [1887,] | 2.173147e-02 | 2.903530e-02 |
| [1888,] | 2.166047e-02 | 2.924486e-02 |

---

|         |              |              |
|---------|--------------|--------------|
| [1889,] | 2.166776e-02 | 2.939192e-02 |
| [1890,] | 2.166670e-02 | 2.928573e-02 |
| [1891,] | 2.170072e-02 | 2.890044e-02 |
| [1892,] | 2.178735e-02 | 2.855123e-02 |
| [1893,] | 2.165330e-02 | 2.872549e-02 |
| [1894,] | 2.131812e-02 | 2.927262e-02 |
| [1895,] | 2.135178e-02 | 2.933728e-02 |
| [1896,] | 2.171629e-02 | 2.876925e-02 |
| [1897,] | 2.184198e-02 | 2.855235e-02 |
| [1898,] | 2.191548e-02 | 2.871375e-02 |
| [1899,] | 2.239582e-02 | 2.834403e-02 |

**Table S2.** Instrumental texture analysis and TSS parameters.

| Training set |         |              |               |   |
|--------------|---------|--------------|---------------|---|
| Sample       | DiamEqu | Hardness (N) | TSS (°Brix) ‡ |   |
| T1_1         | 18.6    | 19.12        | 19.6±0.2      | l |
| T1_2         | 17.0    | 14.58        | 18.5±0.1      | g |
| T1_3         | 17.6    | 8.70         | 16.6±0.2      | d |
| T1_4         | 19.7    | 14.21        | 18.7±0.2      | h |
| T1_5         | 21.1    | 14.93        | 18.2±0.1      | g |
| T1_6         | 17.4    | 9.55         | 16.7±0.2      | d |
| T1_7         | 18.7    | 13.58        | 17.7±0.2      | f |
| T1_8         | 22.8    | 17.12        | 18.3±0.1      | g |
| T1_9         | 17.3    | 8.08         | 19.2±0.1      | i |
| T1_10        | 23      | 17.96        | 16.6±0.2      | d |
| T1_11        | 17.6    | 9.45         | 17.7±0.2      | f |
| T1_12        | 18.1    | 12.83        | 17.2±0.1      | e |
| T1_13        | 18.7    | 16.86        | 18.1±0.1      | g |
| T1_14        | 19.3    | 12.68        | 21.5±0.1      | o |
| T1_15        | 17.9    | 12.11        | 18.1±0.1      | g |
| T1_16        | 20      | 16.40        | 17.2±0.1      | e |
| T1_17        | 18.6    | 13.23        | 19.3±0.1      | i |
| T1_18        | 19.6    | 14.38        | 18.2±0.1      | g |
| T1_19        | 18.8    | 13.12        | 22.7±0.2      | q |
| T1_20        | 18.4    | 9.27         | 19.4±0.1      | i |
| T1_21        | 19.1    | 14.36        | 17.1±0.1      | e |
| T1_22        | 18.3    | 17.3         | 20.5±0.1      | m |
| T1_23        | 19.3    | 12.92        | 18.3±0.1      | g |
| T1_24        | 17.6    | 9.74         | 20.3±0.1      | m |
| T1_25        | 18.2    | 14.55        | 17.1±0.1      | e |

2

3

4

|       |      |       |          |   |
|-------|------|-------|----------|---|
| T1_26 | 19.9 | 12.18 | 16.4±0.1 | c |
| T1_27 | 18.8 | 14.50 | 15.5±0.1 | a |
| T1_28 | 17.4 | 14.73 | 18.0±0.1 | g |
| T1_29 | 18.3 | 10.26 | 18.3±0.1 | g |
| T2_1  | 18.6 | 9.58  | 15.8±0.2 | b |
| T2_2  | 19.5 | 15.29 | 19.3±0.1 | i |
| T2_3  | 18.8 | 14.66 | 19.2±0.1 | i |
| T2_4  | 18.4 | 9.73  | 21.8±0.2 | p |
| T2_5  | 18   | 15.70 | 16.7±0.2 | d |
| T2_6  | 18.6 | 12.73 | 16.4±0.1 | c |
| T2_7  | 17.7 | 11.24 | 15.6±0.2 | b |
| T2_8  | 20.2 | 20.41 | 17.7±0.1 | f |
| T2_9  | 19.4 | 15.99 | 19.0±0.1 | h |
| T2_10 | 19   | 8.80  | 16.9±0.2 | d |
| T2_11 | 18.1 | 9.84  | 20.8±0.2 | n |
| T2_12 | 19.7 | 14.43 | 17.0±0.1 | e |
| T2_13 | 20.2 | 13.18 | 19.5±0.1 | i |
| T2_14 | 16.1 | 8.60  | 21.9±0.2 | p |
| T2_15 | 18.3 | 13.91 | 17.6±0.2 | f |
| T2_16 | 19.2 | 15.48 | 19.4±0.1 | i |
| T2_17 | 20.6 | 14.92 | 16.0±0.1 | c |
| T2_18 | 19.1 | 14.04 | 21.6±0.2 | p |
| T2_19 | 20.2 | 19.65 | 20.4±0.2 | m |
| T2_20 | 19.5 | 16.71 | 18.1±0.1 | g |
| T2_21 | 18.7 | 12.25 | 21.1±0.1 | o |
| T2_22 | 19.5 | 15.85 | 18.1±0.1 | g |
| T2_23 | 20.4 | 19.67 | 19.4±0.1 | i |
| T2_24 | 19.4 | 18.46 | 17.4±0.1 | e |
| T2_25 | 17.4 | 16.32 | 19.0±0.1 | h |
| T2_26 | 18.3 | 10.76 | 16.7±0.2 | d |
| T2_27 | 21.5 | 16.31 | 18.6±0.2 | h |
| T2_28 | 18.8 | 10.64 | 21.2±0.1 | o |
| T2_29 | 17.5 | 14.83 | 18.7±0.2 | h |
| T2_30 | 19.5 | 15.26 | 19.1±0.1 | i |
| T3_1  | 20.3 | 9.48  | 18.5±0.1 | g |
| T3_2  | 18.5 | 11.18 | 17.4±0.1 | e |
| T3_3  | 19   | 10.09 | 19.6±0.2 | l |
| T3_4  | 19.3 | 15.76 | 19.2±0.1 | i |
| T3_5  | 18.4 | 13.72 | 19.5±0.1 | i |
| T3_6  | 18.8 | 17.80 | 19.0±0.1 | h |
| T3_7  | 20.3 | 14.88 | 16.8±0.2 | d |

|                          |                |                     |                      |   |
|--------------------------|----------------|---------------------|----------------------|---|
| T3_8                     | 19.5           | 11.03               | 17.0±0.1             | e |
| T3_9                     | 19.2           | 19.82               | 17.2±0.1             | e |
| T3_10                    | 18.6           | 9.72                | 15.2±0.1             | a |
| T3_11                    | 20.2           | 10.44               | 20.8±0.2             | n |
| T3_12                    | 17.9           | 8.79                | 18.3±0.1             | g |
| T3_13                    | 16.8           | 8.94                | 17.6±0.2             | f |
| T3_14                    | 19.6           | 17.32               | 19.3±0.1             | i |
| T3_15                    | 19.2           | 13.01               | 17.1±0.1             | e |
| T3_16                    | 16.9           | 10.30               | 19.6±0.2             | l |
| T3_17                    | 16.6           | 7.24                | 21.8±0.2             | p |
| T3_18                    | 18.2           | 9.64                | 18.5±0.1             | g |
| T3_19                    | 18.5           | 8.79                | 19.4±0.1             | i |
| T3_20                    | 19.9           | 13.13               | 17.4±0.1             | e |
| T3_21                    | 19.9           | 15.46               | 18.2±0.1             | g |
| T3_22                    | 19.2           | 10.3                | 19.7±0.2             | l |
| T3_23                    | 19.5           | 19.31               | 17.4±0.1             | e |
| T3_24                    | 18.4           | 9.55                | 19.8±0.2             | l |
| T3_25                    | 20.1           | 17.45               | 18.2±0.1             | g |
| T3_26                    | 18.6           | 13.56               | 17.1±0.1             | e |
| T3_27                    | 17.7           | 14.17               | 17.5±0.1             | e |
| T3_28                    | 19.2           | 13.23               | 17.2±0.1             | e |
| T3_29                    | 19.4           | 20.55               | 16.7±0.2             | d |
| T3_30                    | 18.7           | 15.76               | 17.4±0.1             | e |
| <b>External test set</b> |                |                     |                      |   |
| <b>Sample</b>            | <b>DiamEqu</b> | <b>Hardness (N)</b> | <b>TSS (°Brix) ‡</b> |   |
| T1_31                    | 23             | 17.9                | 16.8±0.2             | d |
| T1_32                    | 17.6           | 9.5                 | 17.6±0.2             | f |
| T1_33                    | 18.1           | 13                  | 17.3±0.1             | e |
| T2_31                    | 19             | 8.7                 | 16.8±0.2             | d |
| T2_32                    | 18.1           | 9.8                 | 20.7±0.1             | n |
| T2_33                    | 19.7           | 14.4                | 17.1±0.1             | e |
| T3_31                    | 18.6           | 9.7                 | 15.2±0.1             | a |
| T3_32                    | 20.2           | 10.3                | 20.7±0.2             | n |
| T3_33                    | 17.9           | 8.9                 | 18.2±0.1             | g |

‡Mean ± SD. Different letters within the same column indicate a significant difference among samples (ANOVA test followed by a Tukey post hoc test using a p-value <0.05).



**Table S3.** Regression coefficients, standard error, p-values and t-values for best iPLS on “hardness” parameter (ncomp = 4)

| Interval | Wave numbers | Reg. coeffs | Std. err. | t-value  | p-value ( $\alpha=0.05$ ) |
|----------|--------------|-------------|-----------|----------|---------------------------|
| 763      | 8496         | -1.92969    | 1.038223  | -1.85677 | 0.096307                  |
| 764      | 8492         | -1.7279     | 1.042464  | -1.66088 | 0.131105                  |
| 765      | 8488         | -2.30822    | 0.985412  | -2.35339 | 0.043065                  |
| 766      | 8484         | -2.73787    | 0.831196  | -3.30815 | 0.009111                  |
| 767      | 8480         | -1.77608    | 0.64137   | -2.77473 | 0.021586                  |
| 768      | 8476         | -1.15797    | 0.622962  | -1.86047 | 0.095742                  |
| 769      | 8472         | -2.29818    | 0.722173  | -3.19606 | 0.0109                    |
| 770      | 8468         | -3.57046    | 0.792756  | -4.5235  | 0.00144                   |
| 771      | 8464         | -3.26976    | 0.806219  | -4.06463 | 0.002822                  |
| 772      | 8460         | -2.4337     | 0.797087  | -3.04862 | 0.013824                  |
| 773      | 8456         | -2.33325    | 0.529764  | -4.39709 | 0.001728                  |
| 774      | 8452         | -2.32671    | 1.081519  | -2.15311 | 0.059734                  |
| 775      | 8448         | -1.90051    | 1.501195  | -1.26879 | 0.236348                  |
| 776      | 8444         | -1.16457    | 1.318182  | -0.88586 | 0.398744                  |
| 777      | 8440         | -0.43217    | 1.010455  | -0.42776 | 0.678881                  |
| 778      | 8436         | -0.2833     | 1.101428  | -0.25266 | 0.806209                  |
| 779      | 8432         | -0.50941    | 1.24736   | -0.40097 | 0.697792                  |
| 780      | 8428         | -0.85394    | 1.216783  | -0.69489 | 0.504669                  |
| 781      | 8424         | -1.5892     | 0.932707  | -1.70712 | 0.121982                  |
| 782      | 8420         | -1.99587    | 1.058893  | -1.90033 | 0.08984                   |
| 783      | 8416         | -1.54263    | 1.108804  | -1.40691 | 0.193035                  |
| 784      | 8412         | -0.91569    | 1.127246  | -0.82244 | 0.432074                  |
| 785      | 8408         | -0.61618    | 1.235641  | -0.5043  | 0.626168                  |
| 786      | 8404         | -0.77839    | 1.019338  | -0.76595 | 0.463321                  |
| 787      | 8400         | -1.2748     | 0.732415  | -1.73988 | 0.115873                  |
| 788      | 8396         | -1.49836    | 0.974507  | -1.53773 | 0.158495                  |
| 789      | 8392         | -1.48603    | 1.169589  | -1.27039 | 0.235803                  |
| 790      | 8388         | -1.68708    | 1.025575  | -1.64206 | 0.134994                  |
| 791      | 8384         | -1.92725    | 1.106812  | -1.73713 | 0.116375                  |
| 792      | 8380         | -2.31289    | 1.17648   | -1.96526 | 0.080957                  |
| 793      | 8376         | -2.72368    | 1.012612  | -2.69602 | 0.024553                  |
| 794      | 8372         | -2.30143    | 0.86828   | -2.66136 | 0.025988                  |
| 795      | 8368         | -1.26664    | 0.829799  | -1.53371 | 0.159469                  |
| 796      | 8364         | -0.7591     | 0.898771  | -0.84916 | 0.417809                  |
| 797      | 8360         | -1.12471    | 0.933768  | -1.21364 | 0.255773                  |
| 798      | 8356         | -1.83071    | 0.933915  | -1.97279 | 0.079983                  |

12  
13  
14  
15

|     |      |          |          |          |          |
|-----|------|----------|----------|----------|----------|
| 799 | 8352 | -2.40616 | 0.881745 | -2.74008 | 0.022845 |
| 800 | 8348 | -2.65659 | 0.926394 | -2.8775  | 0.018252 |
| 801 | 8344 | -2.38336 | 1.103617 | -2.16958 | 0.058154 |
| 802 | 8340 | -1.83056 | 1.175908 | -1.56767 | 0.151403 |
| 803 | 8336 | -1.59672 | 1.002068 | -1.60572 | 0.142799 |
| 804 | 8332 | -1.5481  | 0.758937 | -2.04982 | 0.070634 |
| 805 | 8328 | -1.13332 | 0.654834 | -1.73156 | 0.117398 |
| 806 | 8324 | -0.69298 | 0.694251 | -0.99157 | 0.347317 |
| 807 | 8320 | -0.78175 | 0.552211 | -1.4014  | 0.194623 |
| 808 | 8316 | -0.99372 | 0.669331 | -1.46828 | 0.176089 |
| 809 | 8312 | -1.06133 | 0.720025 | -1.46091 | 0.178054 |
| 810 | 8308 | -1.35238 | 0.735195 | -1.83709 | 0.09937  |
| 811 | 8304 | -1.72811 | 0.844282 | -2.04893 | 0.070736 |
| 812 | 8300 | -1.76161 | 0.784584 | -2.24133 | 0.051731 |
| 813 | 8296 | -1.58033 | 0.604593 | -2.60306 | 0.028595 |
| 814 | 8292 | -1.47677 | 0.61388  | -2.40222 | 0.039753 |
| 815 | 8288 | -1.37535 | 0.678243 | -2.03696 | 0.072119 |
| 816 | 8284 | -1.07299 | 0.72834  | -1.48584 | 0.171485 |
| 817 | 8280 | -0.92513 | 0.991506 | -0.93828 | 0.372596 |
| 818 | 8276 | -1.0709  | 0.947551 | -1.13137 | 0.287145 |
| 819 | 8272 | -0.83009 | 0.624821 | -1.32744 | 0.217049 |
| 820 | 8268 | -0.59415 | 0.551897 | -1.08059 | 0.307984 |
| 821 | 8264 | -1.01163 | 0.674691 | -1.51155 | 0.164937 |
| 822 | 8260 | -1.19487 | 0.859614 | -1.39366 | 0.196874 |
| 823 | 8256 | -0.98081 | 0.837387 | -1.1596  | 0.276048 |
| 824 | 8252 | -1.0625  | 0.751379 | -1.39706 | 0.195883 |
| 825 | 8248 | -1.37621 | 0.813238 | -1.68369 | 0.126529 |
| 826 | 8244 | -1.92547 | 0.807684 | -2.38439 | 0.040932 |
| 827 | 8240 | -2.24907 | 0.848135 | -2.65928 | 0.026077 |
| 828 | 8236 | -1.95817 | 1.073818 | -1.83328 | 0.099973 |
| 829 | 8232 | -1.88136 | 1.010156 | -1.87389 | 0.093716 |
| 830 | 8228 | -2.00962 | 0.73071  | -2.756   | 0.022257 |
| 831 | 8224 | -1.77747 | 0.693849 | -2.55484 | 0.030948 |
| 832 | 8220 | -1.50678 | 0.652087 | -2.30187 | 0.046856 |
| 833 | 8216 | -1.191   | 0.586108 | -2.02421 | 0.073619 |
| 834 | 8212 | -0.77949 | 0.747544 | -1.03382 | 0.3282   |
| 835 | 8208 | -1.24626 | 0.639969 | -1.94213 | 0.084022 |
| 836 | 8204 | -2.42943 | 0.682287 | -3.56964 | 0.006028 |
| 837 | 8200 | -2.84381 | 0.735204 | -3.87915 | 0.003736 |
| 838 | 8196 | -2.20072 | 0.652807 | -3.37463 | 0.008196 |
| 839 | 8192 | -1.42127 | 0.651387 | -2.17812 | 0.05735  |

|     |      |          |          |          |          |
|-----|------|----------|----------|----------|----------|
| 840 | 8188 | -1.28375 | 0.748134 | -1.71097 | 0.121249 |
| 841 | 8184 | -1.55966 | 0.739685 | -2.10621 | 0.064466 |
| 842 | 8180 | -1.98766 | 0.746253 | -2.66721 | 0.02574  |
| 843 | 8176 | -2.89073 | 0.664217 | -4.36452 | 0.001811 |
| 844 | 8172 | -3.72059 | 0.783485 | -4.76453 | 0.001023 |
| 845 | 8168 | -3.4001  | 0.827926 | -4.12104 | 0.002594 |
| 846 | 8164 | -2.3363  | 0.83618  | -2.80496 | 0.020546 |
| 847 | 8160 | -1.7804  | 0.91126  | -1.9651  | 0.080977 |
| 848 | 8156 | -2.17653 | 1.001384 | -2.19011 | 0.05624  |
| 849 | 8152 | -2.92489 | 1.009982 | -2.91679 | 0.017121 |
| 850 | 8148 | -3.15241 | 0.732171 | -4.32885 | 0.001908 |
| 851 | 8144 | -2.77337 | 0.765488 | -3.63609 | 0.005434 |
| 852 | 8140 | -2.51501 | 0.973798 | -2.59149 | 0.029142 |
| 853 | 8136 | -2.73159 | 0.860107 | -3.18822 | 0.011038 |
| 854 | 8132 | -3.183   | 0.736813 | -4.33414 | 0.001894 |
| 855 | 8128 | -3.54502 | 0.783476 | -4.5381  | 0.00141  |
| 856 | 8124 | -3.35975 | 0.820444 | -4.10746 | 0.002647 |
| 857 | 8120 | -2.46666 | 0.665921 | -3.70982 | 0.004846 |
| 858 | 8116 | -1.69238 | 0.591526 | -2.85917 | 0.018806 |
| 859 | 8112 | -1.65687 | 0.65208  | -2.54914 | 0.031239 |
| 860 | 8108 | -1.79535 | 0.646811 | -2.79567 | 0.02086  |
| 861 | 8104 | -1.61552 | 0.517309 | -3.14399 | 0.011852 |
| 862 | 8100 | -1.35753 | 0.630877 | -2.15672 | 0.059384 |
| 863 | 8096 | -1.26651 | 0.730999 | -1.7244  | 0.118723 |
| 864 | 8092 | -1.38282 | 0.697745 | -1.96446 | 0.081061 |
| 865 | 8088 | -1.69066 | 0.586195 | -2.86708 | 0.018565 |
| 866 | 8084 | -1.95715 | 0.450679 | -4.33669 | 0.001887 |
| 867 | 8080 | -1.74815 | 0.607394 | -2.8801  | 0.018175 |
| 868 | 8076 | -1.23228 | 0.804682 | -1.53107 | 0.160111 |
| 869 | 8072 | -1.27497 | 0.678244 | -1.87976 | 0.092841 |
| 870 | 8068 | -2.15867 | 0.502011 | -4.31527 | 0.001947 |
| 871 | 8064 | -3.03196 | 0.680767 | -4.47814 | 0.001537 |
| 872 | 8060 | -3.27578 | 0.816249 | -4.03651 | 0.002944 |
| 873 | 8056 | -3.14364 | 0.88332  | -3.57836 | 0.005946 |
| 874 | 8052 | -2.84713 | 0.852518 | -3.35654 | 0.008435 |
| 875 | 8048 | -2.33908 | 0.769452 | -3.05079 | 0.013775 |
| 876 | 8044 | -1.90133 | 0.713013 | -2.66735 | 0.025734 |
| 877 | 8040 | -2.10696 | 0.543517 | -3.8735  | 0.003769 |
| 878 | 8036 | -2.6022  | 0.499017 | -5.22166 | 0.000548 |
| 879 | 8032 | -2.57567 | 0.653528 | -3.95565 | 0.003326 |
| 880 | 8028 | -2.2217  | 0.660466 | -3.37976 | 0.00813  |

|     |      |          |          |          |          |
|-----|------|----------|----------|----------|----------|
| 881 | 8024 | -2.19373 | 0.620425 | -3.55072 | 0.006209 |
| 882 | 8020 | -2.63966 | 0.634414 | -4.17654 | 0.002388 |
| 883 | 8016 | -3.0682  | 0.650753 | -4.73079 | 0.001073 |
| 884 | 8012 | -2.94048 | 0.612681 | -4.80902 | 0.000962 |
| 885 | 8008 | -2.56399 | 0.694234 | -3.69227 | 0.00498  |
| 886 | 8004 | -2.26845 | 0.511029 | -4.43062 | 0.001646 |
| 887 | 8000 | -1.76767 | 0.617556 | -2.85116 | 0.019053 |
| 888 | 7996 | -1.56665 | 0.851088 | -1.83207 | 0.100166 |
| 889 | 7992 | -2.0572  | 0.938839 | -2.18863 | 0.056376 |
| 890 | 7988 | -2.23582 | 0.929051 | -2.40858 | 0.039341 |
| 891 | 7984 | -2.05906 | 0.88733  | -2.32639 | 0.045012 |
| 892 | 7980 | -2.33022 | 0.846835 | -2.76466 | 0.021944 |
| 893 | 7976 | -2.55555 | 0.813697 | -3.15608 | 0.011623 |
| 894 | 7972 | -2.11138 | 0.675863 | -3.13456 | 0.012033 |
| 895 | 7968 | -1.45194 | 0.532332 | -2.72949 | 0.023244 |
| 896 | 7964 | -1.27711 | 0.509768 | -2.50328 | 0.03368  |
| 897 | 7960 | -1.63916 | 0.651933 | -2.51604 | 0.032982 |
| 898 | 7956 | -2.05182 | 0.73463  | -2.79961 | 0.020726 |
| 899 | 7952 | -2.20042 | 0.708281 | -3.11549 | 0.012409 |
| 900 | 7948 | -1.93943 | 0.65432  | -2.96681 | 0.015784 |
| 901 | 7944 | -1.48298 | 0.862139 | -1.71648 | 0.120208 |
| 902 | 7940 | -1.45524 | 0.899874 | -1.6173  | 0.140268 |
| 903 | 7936 | -1.91962 | 0.722948 | -2.6657  | 0.025803 |
| 904 | 7932 | -2.47029 | 0.641729 | -3.86507 | 0.003817 |
| 905 | 7928 | -2.72349 | 0.739075 | -3.69413 | 0.004965 |
| 906 | 7924 | -2.55077 | 0.791602 | -3.22172 | 0.01046  |
| 907 | 7920 | -2.24525 | 0.774499 | -2.88919 | 0.017908 |
| 908 | 7916 | -2.04468 | 0.562283 | -3.62557 | 0.005524 |
| 909 | 7912 | -2.15521 | 0.458888 | -4.7099  | 0.001105 |
| 910 | 7908 | -2.77051 | 0.577643 | -4.82857 | 0.000936 |
| 911 | 7904 | -3.33761 | 0.771503 | -4.35323 | 0.001842 |
| 912 | 7900 | -3.24144 | 0.799561 | -4.07128 | 0.002794 |
| 913 | 7896 | -2.77939 | 0.811873 | -3.42993 | 0.007509 |
| 914 | 7892 | -2.3756  | 0.793182 | -2.99422 | 0.015097 |
| 915 | 7888 | -2.04162 | 0.726296 | -2.80775 | 0.020452 |
| 916 | 7884 | -1.84777 | 0.70832  | -2.61115 | 0.028217 |
| 917 | 7880 | -1.90725 | 0.649048 | -2.95134 | 0.016186 |
| 918 | 7876 | -2.09194 | 0.740029 | -2.84446 | 0.019263 |
| 919 | 7872 | -2.03611 | 0.92919  | -2.20497 | 0.054894 |
| 920 | 7868 | -1.74108 | 0.999933 | -1.74654 | 0.114666 |
| 921 | 7864 | -1.96926 | 0.898264 | -2.19183 | 0.056083 |

|     |      |          |          |          |          |
|-----|------|----------|----------|----------|----------|
| 922 | 7860 | -2.61853 | 0.764745 | -3.42709 | 0.007543 |
| 923 | 7856 | -2.82576 | 0.779376 | -3.63498 | 0.005443 |
| 924 | 7852 | -2.69005 | 1.013829 | -2.66527 | 0.025822 |
| 925 | 7848 | -2.40607 | 1.099407 | -2.20265 | 0.055102 |
| 926 | 7844 | -1.97654 | 0.913491 | -2.17815 | 0.057347 |
| 927 | 7840 | -1.78963 | 0.73181  | -2.46189 | 0.036047 |
| 928 | 7836 | -1.9928  | 0.626163 | -3.2075  | 0.010702 |
| 929 | 7832 | -2.17672 | 0.556266 | -3.94172 | 0.003397 |
| 930 | 7828 | -2.09587 | 0.702134 | -3.00413 | 0.014857 |
| 931 | 7824 | -2.14955 | 0.767016 | -2.81959 | 0.02006  |
| 932 | 7820 | -2.49484 | 0.792023 | -3.16568 | 0.011445 |
| 933 | 7816 | -2.75733 | 0.855293 | -3.23777 | 0.010195 |
| 934 | 7812 | -2.77373 | 0.845628 | -3.2945  | 0.009311 |
| 935 | 7808 | -2.61459 | 0.69434  | -3.78128 | 0.00434  |
| 936 | 7804 | -2.37073 | 0.494482 | -4.81838 | 0.000949 |
| 937 | 7800 | -2.20275 | 0.37504  | -5.9119  | 0.000226 |
| 938 | 7796 | -2.16973 | 0.407039 | -5.36045 | 0.000456 |
| 939 | 7792 | -2.15851 | 0.470708 | -4.599   | 0.001292 |
| 940 | 7788 | -2.05954 | 0.497513 | -4.1446  | 0.002504 |
| 941 | 7784 | -2.01698 | 0.514402 | -3.92578 | 0.00348  |
| 942 | 7780 | -2.07229 | 0.707442 | -2.93579 | 0.0166   |
| 943 | 7776 | -2.08771 | 0.943128 | -2.22136 | 0.053446 |
| 944 | 7772 | -1.95971 | 0.992228 | -1.98158 | 0.078858 |
| 945 | 7768 | -1.54204 | 0.981985 | -1.56881 | 0.151139 |
| 946 | 7764 | -1.10574 | 0.86924  | -1.2623  | 0.238567 |
| 947 | 7760 | -1.02481 | 0.575261 | -1.77224 | 0.110117 |
| 948 | 7756 | -1.00518 | 0.494854 | -2.03369 | 0.072501 |
| 949 | 7752 | -0.84649 | 0.566366 | -1.49885 | 0.168143 |
| 950 | 7748 | -1.02837 | 0.550429 | -1.87414 | 0.093679 |
| 951 | 7744 | -1.68639 | 0.47477  | -3.57014 | 0.006023 |
| 952 | 7740 | -2.21177 | 0.661781 | -3.36224 | 0.008359 |
| 953 | 7736 | -2.20926 | 0.623989 | -3.55988 | 0.00612  |
| 954 | 7732 | -1.98773 | 0.538922 | -3.70542 | 0.004879 |
| 955 | 7728 | -1.91076 | 0.674497 | -2.84629 | 0.019205 |
| 956 | 7724 | -1.89951 | 0.794487 | -2.40167 | 0.039789 |
| 957 | 7720 | -1.64559 | 0.765031 | -2.1572  | 0.059337 |
| 958 | 7716 | -0.91883 | 0.517115 | -1.77266 | 0.110044 |
| 959 | 7712 | -0.13969 | 0.309603 | -0.42534 | 0.680578 |
| 960 | 7708 | -0.22494 | 0.491465 | -0.44567 | 0.666364 |
| 961 | 7704 | -1.06373 | 0.631912 | -1.68876 | 0.125532 |
| 962 | 7700 | -1.63482 | 0.668496 | -2.46286 | 0.03599  |

|      |      |          |          |          |          |
|------|------|----------|----------|----------|----------|
| 963  | 7696 | -1.70329 | 0.859672 | -1.99776 | 0.07683  |
| 964  | 7692 | -1.69345 | 0.881356 | -1.93593 | 0.084861 |
| 965  | 7688 | -1.72209 | 0.715489 | -2.42325 | 0.038405 |
| 966  | 7684 | -1.7161  | 0.542059 | -3.1903  | 0.011001 |
| 967  | 7680 | -1.5473  | 0.465971 | -3.35282 | 0.008485 |
| 968  | 7676 | -1.19782 | 0.435707 | -2.7829  | 0.0213   |
| 969  | 7672 | -0.8722  | 0.443056 | -1.99781 | 0.076824 |
| 970  | 7668 | -0.77552 | 0.606401 | -1.30064 | 0.225695 |
| 971  | 7664 | -1.1331  | 0.653513 | -1.76324 | 0.11169  |
| 972  | 7660 | -1.59442 | 0.565947 | -2.86117 | 0.018745 |
| 973  | 7656 | -1.26062 | 0.410283 | -3.11981 | 0.012322 |
| 974  | 7652 | -0.31795 | 0.315824 | -1.03408 | 0.328084 |
| 975  | 7648 | 0.382823 | 0.50411  | 0.752825 | 0.470787 |
| 976  | 7644 | 0.885492 | 0.841742 | 1.051064 | 0.320631 |
| 977  | 7640 | 1.04019  | 0.876529 | 1.187594 | 0.26539  |
| 978  | 7636 | 0.570925 | 0.848004 | 0.672924 | 0.517899 |
| 979  | 7632 | 0.158054 | 0.935823 | 0.167529 | 0.870658 |
| 980  | 7628 | 0.309214 | 0.799918 | 0.385388 | 0.708901 |
| 981  | 7624 | 0.865352 | 0.603727 | 1.433968 | 0.185397 |
| 982  | 7620 | 1.430247 | 0.64291  | 2.227282 | 0.052931 |
| 983  | 7616 | 1.502841 | 0.632752 | 2.374791 | 0.041581 |
| 984  | 7612 | 1.205068 | 0.488279 | 2.462665 | 0.036001 |
| 985  | 7608 | 1.299613 | 0.549782 | 2.370478 | 0.041876 |
| 986  | 7604 | 1.644564 | 0.779055 | 2.130314 | 0.06199  |
| 987  | 7600 | 1.819876 | 0.935421 | 1.964935 | 0.080999 |
| 988  | 7596 | 1.736324 | 0.644508 | 2.709135 | 0.024032 |
| 989  | 7592 | 1.024957 | 0.370664 | 2.762225 | 0.022032 |
| 990  | 7588 | 0.566385 | 0.576048 | 0.974695 | 0.35518  |
| 991  | 7584 | 1.354346 | 0.316205 | 4.277189 | 0.002058 |
| 992  | 7580 | 2.552352 | 0.40201  | 6.353415 | 0.000132 |
| 993  | 7576 | 3.051035 | 0.633728 | 4.818882 | 0.000948 |
| 994  | 7572 | 2.798721 | 0.681484 | 4.109134 | 0.00264  |
| 995  | 7568 | 2.535269 | 0.732186 | 3.464318 | 0.007112 |
| 996  | 7564 | 2.570126 | 0.673005 | 3.821923 | 0.004078 |
| 997  | 7560 | 2.655008 | 0.750103 | 3.542102 | 0.006293 |
| 998  | 7556 | 2.740136 | 0.877328 | 3.12642  | 0.012192 |
| 999  | 7552 | 2.835244 | 0.817126 | 3.47574  | 0.006985 |
| 1000 | 7548 | 3.306342 | 0.74204  | 4.46616  | 0.001563 |
| 1001 | 7544 | 4.070374 | 0.684466 | 5.961048 | 0.000212 |
| 1002 | 7540 | 4.262638 | 0.628112 | 6.797419 | 7.93E-05 |
| 1003 | 7536 | 3.939882 | 0.732235 | 5.383473 | 0.000442 |

|      |             |          |          |          |          |
|------|-------------|----------|----------|----------|----------|
| 1004 | 7532        | 3.62262  | 0.840277 | 4.31122  | 0.001958 |
| 1005 | 7528        | 3.324411 | 0.888217 | 3.74212  | 0.00461  |
| 1006 | 7524        | 3.231004 | 0.862951 | 3.744519 | 0.004593 |
| 1007 | 7520        | 3.356857 | 0.762031 | 4.407755 | 0.001701 |
| 1008 | 7516        | 3.384806 | 0.717351 | 4.721475 | 0.001087 |
| 1009 | 7512        | 3.531223 | 0.689544 | 5.129769 | 0.00062  |
| 1010 | 7508        | 3.955162 | 0.999022 | 3.972352 | 0.003243 |
| 1011 | 7504        | 4.302835 | 1.085199 | 3.978978 | 0.003211 |
| 1012 | 7500        | 4.601388 | 0.98417  | 4.689345 | 0.001137 |
| 1013 | 7496        | 4.862741 | 1.066592 | 4.5731   | 0.001341 |
| 1014 | 7492        | 4.800517 | 1.036477 | 4.646283 | 0.001208 |
| 1015 | 7488        | 4.890555 | 0.919638 | 5.334913 | 0.000472 |
| 1016 | 7484        | 5.533132 | 0.984925 | 5.638095 | 0.000318 |
| 1144 | <b>6972</b> | -3.84789 | 1.081782 | -3.56487 | 0.006073 |
| 1145 | 6968        | -4.01187 | 1.219901 | -3.30205 | 0.0092   |
| 1146 | 6964        | -4.32045 | 1.100951 | -3.9391  | 0.003411 |
| 1147 | 6960        | -4.51829 | 1.157484 | -3.91097 | 0.003559 |
| 1148 | 6956        | -4.27349 | 1.153426 | -3.70683 | 0.004869 |
| 1149 | 6952        | -4.10606 | 0.887108 | -4.62859 | 0.001239 |
| 1150 | 6948        | -4.33765 | 0.931997 | -4.65776 | 0.001189 |
| 1151 | 6944        | -4.43743 | 1.08953  | -4.08065 | 0.002755 |
| 1152 | 6940        | -4.43828 | 1.019766 | -4.36092 | 0.001821 |
| 1153 | 6936        | -4.53254 | 0.905506 | -5.01348 | 0.000726 |
| 1154 | 6932        | -4.2791  | 0.703632 | -6.09053 | 0.000181 |
| 1155 | 6928        | -3.77615 | 0.467432 | -8.08786 | 2.03E-05 |
| 1156 | 6924        | -3.84759 | 0.61899  | -6.22655 | 0.000154 |
| 1157 | 6920        | -4.36768 | 0.968871 | -4.51737 | 0.001452 |
| 1158 | 6916        | -4.54809 | 0.973387 | -4.67599 | 0.001159 |
| 1159 | 6912        | -4.41999 | 0.797533 | -5.54226 | 0.00036  |
| 1160 | 6908        | -4.45638 | 0.665136 | -6.70791 | 8.77E-05 |
| 1161 | 6904        | -4.53243 | 0.634831 | -7.1512  | 5.36E-05 |
| 1162 | 6900        | -4.17388 | 0.734594 | -5.68484 | 0.0003   |
| 1163 | 6896        | -3.57845 | 0.771028 | -4.63863 | 0.001222 |
| 1164 | 6892        | -3.43842 | 0.839939 | -4.09331 | 0.002704 |
| 1165 | 6888        | -3.72504 | 0.865707 | -4.30744 | 0.001969 |
| 1166 | 6884        | -3.85656 | 0.896604 | -4.30932 | 0.001964 |
| 1167 | 6880        | -3.80891 | 0.784882 | -4.86499 | 0.00089  |
| 1168 | 6876        | -3.87513 | 0.794064 | -4.89257 | 0.000856 |
| 1169 | 6872        | -3.94404 | 0.789286 | -5.00322 | 0.000736 |
| 1170 | 6868        | -3.79747 | 0.848996 | -4.47021 | 0.001554 |
| 1171 | 6864        | -3.42139 | 1.067538 | -3.20074 | 0.010818 |

|      |      |          |          |          |          |
|------|------|----------|----------|----------|----------|
| 1172 | 6860 | -2.99475 | 1.125662 | -2.6587  | 0.026101 |
| 1173 | 6856 | -2.93869 | 0.945757 | -3.10849 | 0.012549 |
| 1174 | 6852 | -3.20369 | 0.716055 | -4.47718 | 0.001539 |
| 1175 | 6848 | -3.28889 | 0.792545 | -4.15181 | 0.002478 |
| 1176 | 6844 | -3.2788  | 0.916485 | -3.58265 | 0.005906 |
| 1177 | 6840 | -3.35889 | 0.927613 | -3.63197 | 0.005469 |
| 1178 | 6836 | -3.56987 | 1.037158 | -3.4542  | 0.007227 |
| 1179 | 6832 | -3.87184 | 1.167742 | -3.32579 | 0.008858 |
| 1180 | 6828 | -3.8049  | 1.067701 | -3.57213 | 0.006004 |
| 1181 | 6824 | -3.54695 | 0.892447 | -3.98331 | 0.00319  |
| 1182 | 6820 | -3.39931 | 0.801126 | -4.25357 | 0.002131 |
| 1183 | 6816 | -3.20452 | 0.82083  | -3.9118  | 0.003555 |
| 1184 | 6812 | -3.27888 | 0.893578 | -3.67158 | 0.005142 |
| 1185 | 6808 | -3.52647 | 0.810211 | -4.35096 | 0.001848 |
| 1186 | 6804 | -3.14147 | 0.71167  | -4.41193 | 0.001691 |
| 1187 | 6800 | -2.49168 | 0.661576 | -3.76243 | 0.004468 |
| 1188 | 6796 | -2.33962 | 0.711962 | -3.27999 | 0.009529 |
| 1189 | 6792 | -2.16873 | 0.830948 | -2.60238 | 0.028626 |
| 1190 | 6788 | -1.7534  | 0.735319 | -2.36856 | 0.042008 |
| 1191 | 6784 | -1.61968 | 0.708533 | -2.26327 | 0.049909 |
| 1192 | 6780 | -1.93106 | 0.776621 | -2.4733  | 0.035378 |
| 1193 | 6776 | -2.36646 | 0.881492 | -2.68312 | 0.025078 |
| 1194 | 6772 | -2.6533  | 0.871644 | -3.04657 | 0.01387  |
| 1195 | 6768 | -3.1042  | 0.825162 | -3.76871 | 0.004425 |
| 1196 | 6764 | -3.58069 | 0.868869 | -4.1316  | 0.002553 |
| 1197 | 6760 | -3.61738 | 0.940027 | -3.85934 | 0.003851 |
| 1198 | 6756 | -3.29186 | 0.937424 | -3.52391 | 0.006476 |
| 1199 | 6752 | -2.86594 | 0.838657 | -3.4293  | 0.007517 |
| 1200 | 6748 | -2.52301 | 0.867133 | -2.91862 | 0.01707  |
| 1201 | 6744 | -2.12637 | 0.74087  | -2.88086 | 0.018152 |
| 1202 | 6740 | -1.80931 | 0.582111 | -3.1273  | 0.012175 |
| 1203 | 6736 | -1.88314 | 0.688819 | -2.75702 | 0.02222  |
| 1204 | 6732 | -2.16182 | 0.739761 | -2.9428  | 0.016412 |
| 1205 | 6728 | -2.40142 | 0.501837 | -4.80197 | 0.000971 |
| 1206 | 6724 | -2.35658 | 0.591353 | -3.99071 | 0.003154 |
| 1207 | 6720 | -2.08601 | 0.832106 | -2.50952 | 0.033337 |
| 1208 | 6716 | -2.30506 | 1.060016 | -2.17958 | 0.057213 |
| 1209 | 6712 | -2.96758 | 1.156941 | -2.57549 | 0.029917 |
| 1210 | 6708 | -3.03019 | 0.990911 | -3.07403 | 0.013267 |
| 1211 | 6704 | -2.49944 | 0.785873 | -3.19813 | 0.010864 |
| 1212 | 6700 | -2.28646 | 0.710066 | -3.23607 | 0.010223 |



|      |      |          |          |          |          |
|------|------|----------|----------|----------|----------|
| 1213 | 6696 | -2.36663 | 0.610793 | -3.88935 | 0.003679 |
| 1214 | 6692 | -2.05318 | 0.516567 | -3.97981 | 0.003207 |
| 1215 | 6688 | -1.29554 | 0.582901 | -2.21506 | 0.053998 |
| 1216 | 6684 | -0.81919 | 0.714243 | -1.13955 | 0.283892 |
| 1217 | 6680 | -1.00873 | 0.809194 | -1.24723 | 0.243792 |
| 1218 | 6676 | -1.2164  | 0.76716  | -1.59623 | 0.144901 |
| 1219 | 6672 | -1.12208 | 0.863701 | -1.313   | 0.221672 |
| 1220 | 6668 | -1.21754 | 0.89405  | -1.37055 | 0.203724 |
| 1221 | 6664 | -1.32966 | 0.801733 | -1.6571  | 0.131878 |
| 1222 | 6660 | -1.01069 | 0.804594 | -1.24808 | 0.243494 |
| 1223 | 6656 | -0.67427 | 0.72744  | -0.91908 | 0.382026 |
| 1224 | 6652 | -0.5797  | 0.717473 | -0.8035  | 0.442387 |
| 1225 | 6648 | -0.38417 | 0.788659 | -0.48317 | 0.640509 |
| 1226 | 6644 | -0.27176 | 0.779493 | -0.34553 | 0.737634 |
| 1227 | 6640 | -0.68998 | 0.690187 | -1.00782 | 0.339866 |
| 1228 | 6636 | -1.1922  | 0.638365 | -1.89513 | 0.090591 |
| 1229 | 6632 | -1.2715  | 0.665157 | -1.94778 | 0.083264 |
| 1230 | 6628 | -1.12814 | 0.689541 | -1.66966 | 0.129327 |
| 1231 | 6624 | -0.86155 | 0.657136 | -1.33795 | 0.213734 |
| 1232 | 6620 | -0.64401 | 0.548327 | -1.19912 | 0.261098 |
| 1233 | 6616 | -0.44485 | 0.444654 | -1.02431 | 0.332432 |
| 1234 | 6612 | 0.096272 | 0.286895 | 0.32908  | 0.749624 |
| 1235 | 6608 | 0.669766 | 0.324178 | 2.08727  | 0.066477 |
| 1236 | 6604 | 0.673867 | 0.459598 | 1.477915 | 0.17355  |
| 1237 | 6600 | 0.308517 | 0.698317 | 0.440859 | 0.669715 |
| 1238 | 6596 | 0.437016 | 0.661188 | 0.661389 | 0.524932 |
| 1239 | 6592 | 0.972507 | 0.446471 | 2.190177 | 0.056234 |
| 1240 | 6588 | 0.987827 | 0.547616 | 1.810293 | 0.103687 |
| 1241 | 6584 | 0.654325 | 0.693311 | 0.938999 | 0.372246 |
| 1242 | 6580 | 0.636546 | 0.612428 | 1.025976 | 0.331687 |
| 1243 | 6576 | 0.806779 | 0.540324 | 1.472961 | 0.174852 |
| 1244 | 6572 | 0.781011 | 0.577643 | 1.333507 | 0.21513  |
| 1245 | 6568 | 0.837953 | 0.693031 | 1.200759 | 0.260493 |
| 1246 | 6564 | 1.239881 | 0.678188 | 1.830382 | 0.100435 |
| 1247 | 6560 | 1.31609  | 0.640743 | 2.058826 | 0.069612 |
| 1248 | 6556 | 0.86162  | 0.584573 | 1.472607 | 0.174945 |
| 1249 | 6552 | 0.549866 | 0.525756 | 1.040387 | 0.325301 |
| 1250 | 6548 | 0.860372 | 0.548595 | 1.5667   | 0.151627 |
| 1251 | 6544 | 1.587942 | 0.600488 | 2.653377 | 0.02633  |
| 1252 | 6540 | 1.902632 | 0.572073 | 3.341172 | 0.008644 |
| 1253 | 6536 | 1.691858 | 0.589438 | 2.876283 | 0.018288 |

|      |             |          |          |          |          |
|------|-------------|----------|----------|----------|----------|
| 1254 | 6532        | 1.706414 | 0.602295 | 2.834334 | 0.019583 |
| 1255 | 6528        | 2.105575 | 0.619508 | 3.411525 | 0.007731 |
| 1256 | 6524        | 2.469102 | 0.721258 | 3.4454   | 0.007328 |
| 1257 | 6520        | 2.627967 | 0.732336 | 3.61165  | 0.005645 |
| 1258 | 6516        | 2.641472 | 0.650329 | 4.082218 | 0.002749 |
| 1259 | 6512        | 2.738048 | 0.658827 | 4.171252 | 0.002407 |
| 1260 | 6508        | 3.062343 | 0.676865 | 4.536873 | 0.001412 |
| 1261 | 6504        | 3.29782  | 0.622698 | 5.307229 | 0.000489 |
| 1262 | 6500        | 3.321378 | 0.723413 | 4.601094 | 0.001289 |
| 1263 | 6496        | 3.44874  | 0.919145 | 3.761616 | 0.004474 |
| 1264 | 6492        | 3.588018 | 0.944524 | 3.8064   | 0.004176 |
| 1265 | 6488        | 3.443395 | 0.647542 | 5.321734 | 0.00048  |
| 1266 | 6484        | 3.207404 | 0.425193 | 7.54195  | 3.53E-05 |
| 1267 | 6480        | 3.264618 | 0.584234 | 5.589004 | 0.000339 |
| 1268 | 6476        | 3.588278 | 0.751227 | 4.787048 | 0.000991 |
| 1269 | <b>6472</b> | 3.609944 | 0.923857 | 3.9234   | 0.003493 |
| 1522 | 5460        | 6.339926 | 0.880183 | 7.211706 | 5.02E-05 |
| 1523 | 5456        | 6.32354  | 0.835673 | 7.573959 | 3.42E-05 |
| 1524 | 5452        | 6.430552 | 0.837762 | 7.683966 | 3.05E-05 |
| 1525 | 5448        | 6.438968 | 0.804865 | 8.008921 | 2.19E-05 |
| 1526 | 5444        | 6.145425 | 0.704735 | 8.727394 | 1.10E-05 |
| 1527 | 5440        | 5.728312 | 0.612365 | 9.360573 | 6.18E-06 |
| 1528 | 5436        | 5.419111 | 0.662282 | 8.188643 | 1.84E-05 |
| 1529 | 5432        | 5.258606 | 0.853638 | 6.164328 | 0.000166 |
| 1530 | 5428        | 5.240663 | 0.972553 | 5.390214 | 0.000439 |
| 1531 | 5424        | 5.197142 | 0.91598  | 5.673771 | 0.000304 |
| 1532 | 5420        | 5.120583 | 0.78656  | 6.50895  | 0.00011  |
| 1533 | 5416        | 5.203051 | 0.690724 | 7.530646 | 3.58E-05 |
| 1534 | 5412        | 5.271927 | 0.654622 | 8.050756 | 2.10E-05 |
| 1535 | 5408        | 5.206307 | 0.637727 | 8.163119 | 1.88E-05 |
| 1536 | 5404        | 5.16083  | 0.737618 | 6.999934 | 6.33E-05 |
| 1537 | 5400        | 5.070871 | 0.912811 | 5.560929 | 0.000351 |
| 1538 | 5396        | 4.819312 | 0.896213 | 5.382948 | 0.000443 |
| 1539 | 5392        | 4.466351 | 0.714679 | 6.251023 | 0.000149 |
| 1540 | 5388        | 4.17423  | 0.563412 | 7.401672 | 4.10E-05 |
| 1541 | 5384        | 4.015121 | 0.558742 | 7.170475 | 5.25E-05 |
| 1542 | 5380        | 3.84112  | 0.562218 | 6.812165 | 7.80E-05 |
| 1543 | 5376        | 3.46907  | 0.611535 | 5.654947 | 0.000312 |
| 1544 | 5372        | 3.064767 | 0.687017 | 4.446653 | 0.001608 |
| 1545 | 5368        | 2.658196 | 0.742785 | 3.56426  | 0.006079 |
| 1546 | 5364        | 2.339714 | 0.766854 | 3.037387 | 0.014077 |

|      |      |          |          |          |          |
|------|------|----------|----------|----------|----------|
| 1547 | 5360 | 2.367026 | 0.733062 | 3.21594  | 0.010558 |
| 1548 | 5356 | 2.279178 | 0.645523 | 3.511126 | 0.006607 |
| 1549 | 5352 | 1.748461 | 0.648458 | 2.673076 | 0.025494 |
| 1550 | 5348 | 1.099339 | 0.791438 | 1.371939 | 0.203307 |
| 1551 | 5344 | 0.426036 | 0.987902 | 0.416892 | 0.686525 |
| 1552 | 5340 | -0.21636 | 1.074898 | -0.22055 | 0.830362 |
| 1553 | 5336 | -0.67528 | 1.172965 | -0.59959 | 0.563571 |
| 1554 | 5332 | -1.10013 | 1.133403 | -0.99499 | 0.345738 |
| 1555 | 5328 | -1.44667 | 1.07104  | -1.37043 | 0.203761 |
| 1556 | 5324 | -1.53649 | 1.160441 | -1.33933 | 0.213302 |
| 1557 | 5320 | -1.68548 | 1.268237 | -1.3442  | 0.211782 |
| 1558 | 5316 | -2.14038 | 1.310496 | -1.64823 | 0.133707 |
| 1559 | 5312 | -2.63372 | 1.289763 | -2.055   | 0.070045 |
| 1560 | 5308 | -2.67019 | 1.230792 | -2.18064 | 0.057115 |
| 1561 | 5304 | -2.30028 | 1.143791 | -2.02157 | 0.073935 |
| 1562 | 5300 | -2.06088 | 1.039254 | -1.99233 | 0.077505 |
| 1563 | 5296 | -2.11457 | 1.042172 | -2.03564 | 0.072273 |
| 1564 | 5292 | -2.19842 | 1.206027 | -1.82899 | 0.100657 |
| 1565 | 5288 | -2.129   | 1.314197 | -1.62773 | 0.138025 |
| 1566 | 5284 | -1.92223 | 1.267941 | -1.52367 | 0.161925 |
| 1567 | 5280 | -1.59046 | 1.13061  | -1.41247 | 0.191443 |
| 1568 | 5276 | -1.09822 | 0.952756 | -1.15678 | 0.277144 |
| 1569 | 5272 | -0.51671 | 0.819797 | -0.6332  | 0.542356 |
| 1570 | 5268 | -0.04959 | 0.768737 | -0.06762 | 0.94757  |
| 1571 | 5264 | 0.220449 | 0.809927 | 0.266326 | 0.795989 |
| 1572 | 5260 | 0.575453 | 0.878775 | 0.646243 | 0.534252 |
| 1573 | 5256 | 1.25675  | 0.733488 | 1.70414  | 0.122552 |
| 1574 | 5252 | 2.080449 | 0.496347 | 4.185076 | 0.002358 |
| 1575 | 5248 | 2.759037 | 0.499809 | 5.517684 | 0.000372 |
| 1576 | 5244 | 3.166959 | 0.683629 | 4.632711 | 0.001232 |
| 1577 | 5240 | 3.236761 | 0.740551 | 4.376394 | 0.00178  |
| 1578 | 5236 | 3.101765 | 0.678036 | 4.587379 | 0.001314 |
| 1579 | 5232 | 2.949148 | 0.613328 | 4.824015 | 0.000942 |
| 1580 | 5228 | 2.843561 | 0.48864  | 5.834123 | 0.000249 |
| 1581 | 5224 | 2.951027 | 0.507583 | 5.823938 | 0.000252 |
| 1582 | 5220 | 3.376535 | 0.587602 | 5.756005 | 0.000274 |
| 1583 | 5216 | 3.959792 | 0.498551 | 7.958152 | 2.31E-05 |
| 1584 | 5212 | 4.377423 | 0.270635 | 16.19554 | 5.79E-08 |
| 1585 | 5208 | 4.292973 | 0.401654 | 10.68038 | 2.06E-06 |
| 1586 | 5204 | 3.914226 | 0.56902  | 6.860108 | 7.39E-05 |
| 1587 | 5200 | 3.724708 | 0.529199 | 7.018062 | 6.20E-05 |

|      |      |          |          |          |          |
|------|------|----------|----------|----------|----------|
| 1588 | 5196 | 3.695842 | 0.630947 | 5.843907 | 0.000246 |
| 1589 | 5192 | 3.657498 | 0.76432  | 4.77502  | 0.001008 |
| 1590 | 5188 | 3.647527 | 0.799895 | 4.551757 | 0.001382 |
| 1591 | 5184 | 3.659325 | 0.880934 | 4.150852 | 0.002481 |
| 1592 | 5180 | 3.607714 | 0.94936  | 3.8031   | 0.004197 |
| 1593 | 5176 | 3.515883 | 0.889891 | 3.955981 | 0.003324 |
| 1594 | 5172 | 3.518392 | 1.019441 | 3.455165 | 0.007216 |
| 1595 | 5168 | 3.6051   | 0.972787 | 3.70909  | 0.004852 |
| 1596 | 5164 | 3.689789 | 0.758975 | 4.861453 | 0.000894 |
| 1597 | 5160 | 3.645237 | 0.753298 | 4.834939 | 0.000928 |
| 1598 | 5156 | 3.424961 | 0.837003 | 4.086821 | 0.00273  |
| 1599 | 5152 | 3.619431 | 0.727333 | 4.976882 | 0.000763 |
| 1600 | 5148 | 4.398353 | 0.628728 | 7.009535 | 6.26E-05 |
| 1601 | 5144 | 4.755318 | 0.640427 | 7.440874 | 3.93E-05 |
| 1602 | 5140 | 4.327308 | 0.665538 | 6.513942 | 0.00011  |
| 1603 | 5136 | 3.803143 | 0.744782 | 5.121688 | 0.000627 |
| 1604 | 5132 | 3.681047 | 0.718374 | 5.144543 | 0.000608 |
| 1605 | 5128 | 3.516528 | 0.583538 | 6.043134 | 0.000192 |
| 1606 | 5124 | 2.927075 | 0.534768 | 5.478295 | 0.000391 |
| 1607 | 5120 | 2.4073   | 0.608417 | 3.958329 | 0.003313 |
| 1608 | 5116 | 2.09324  | 0.72148  | 2.904222 | 0.017475 |
| 1609 | 5112 | 1.860679 | 0.73438  | 2.533748 | 0.032038 |
| 1610 | 5108 | 1.93738  | 0.604638 | 3.200621 | 0.010821 |
| 1611 | 5104 | 2.170586 | 0.533033 | 4.069288 | 0.002803 |
| 1612 | 5100 | 2.06266  | 0.580018 | 3.553557 | 0.006181 |
| 1613 | 5096 | 1.741361 | 0.559599 | 3.106249 | 0.012595 |
| 1614 | 5092 | 1.714157 | 0.419025 | 4.084993 | 0.002737 |
| 1615 | 5088 | 1.868671 | 0.396298 | 4.717106 | 0.001094 |
| 1616 | 5084 | 1.874443 | 0.473721 | 3.96348  | 0.003287 |
| 1617 | 5080 | 1.683551 | 0.515386 | 3.272726 | 0.009641 |
| 1618 | 5076 | 1.398586 | 0.463928 | 3.019182 | 0.014499 |
| 1619 | 5072 | 1.159249 | 0.449267 | 2.584648 | 0.029471 |
| 1620 | 5068 | 0.963528 | 0.556083 | 1.734888 | 0.116785 |
| 1621 | 5064 | 0.763048 | 0.698424 | 1.093064 | 0.302758 |
| 1622 | 5060 | 0.655985 | 0.825168 | 0.798314 | 0.445242 |
| 1623 | 5056 | 0.637675 | 0.796374 | 0.807751 | 0.44006  |
| 1624 | 5052 | 0.58749  | 0.618675 | 0.957194 | 0.363474 |
| 1625 | 5048 | 0.537588 | 0.601932 | 0.89744  | 0.392858 |
| 1626 | 5044 | 0.464065 | 0.629577 | 0.739531 | 0.478429 |
| 1627 | 5040 | 0.303488 | 0.634078 | 0.481044 | 0.641964 |
| 1628 | 5036 | 0.060831 | 0.684346 | 0.094974 | 0.926416 |

|      |      |          |          |          |          |
|------|------|----------|----------|----------|----------|
| 1629 | 5032 | -0.28168 | 0.715198 | -0.38333 | 0.710369 |
| 1630 | 5028 | -0.59803 | 0.671148 | -0.88058 | 0.401448 |
| 1631 | 5024 | -0.63768 | 0.568488 | -1.11843 | 0.292344 |
| 1632 | 5020 | -0.49799 | 0.541143 | -0.92942 | 0.376927 |
| 1633 | 5016 | -0.55055 | 0.556552 | -1.0038  | 0.3417   |
| 1634 | 5012 | -0.82171 | 0.543778 | -1.51981 | 0.16288  |
| 1635 | 5008 | -0.9007  | 0.568248 | -1.58234 | 0.14803  |
| 1636 | 5004 | -0.79012 | 0.71317  | -1.10063 | 0.299623 |
| 1637 | 5000 | -0.99545 | 0.885363 | -1.12084 | 0.29137  |
| 1638 | 4996 | -1.48538 | 0.903929 | -1.64649 | 0.134069 |
| 1639 | 4992 | -1.75417 | 0.826164 | -2.13074 | 0.061947 |
| 1640 | 4988 | -1.89402 | 0.769678 | -2.46702 | 0.035745 |
| 1641 | 4984 | -2.0923  | 0.762976 | -2.74587 | 0.022629 |
| 1642 | 4980 | -2.08453 | 0.715071 | -2.91729 | 0.017107 |
| 1643 | 4976 | -1.79316 | 0.628506 | -2.85047 | 0.019075 |
| 1644 | 4972 | -1.42757 | 0.590264 | -2.40802 | 0.039377 |
| 1645 | 4968 | -1.35619 | 0.592026 | -2.28175 | 0.048424 |
| 1646 | 4964 | -1.90576 | 0.565378 | -3.37313 | 0.008216 |
| 1647 | 4960 | -2.81545 | 0.643263 | -4.38922 | 0.001748 |
| 1648 | 4956 | -3.26214 | 0.746449 | -4.38547 | 0.001757 |
| 1649 | 4952 | -3.04166 | 0.775806 | -3.93371 | 0.003439 |
| 1650 | 4948 | -2.80447 | 0.780714 | -3.59844 | 0.005762 |
| 1651 | 4944 | -2.95511 | 0.835477 | -3.53656 | 0.006348 |
| 1652 | 4940 | -3.47393 | 0.767257 | -4.5281  | 0.00143  |
| 1653 | 4936 | -3.93334 | 0.652286 | -6.03946 | 0.000193 |
| 1654 | 4932 | -4.0759  | 0.681863 | -5.99358 | 0.000204 |
| 1655 | 4928 | -4.20687 | 0.806623 | -5.23161 | 0.000541 |
| 1656 | 4924 | -4.29631 | 0.873178 | -4.93489 | 0.000808 |
| 1657 | 4920 | -4.18586 | 0.915635 | -4.58436 | 0.00132  |
| 1658 | 4916 | -4.09218 | 0.956186 | -4.29304 | 0.002011 |
| 1659 | 4912 | -4.1682  | 1.002833 | -4.17063 | 0.002409 |
| 1660 | 4908 | -4.28815 | 1.040109 | -4.1372  | 0.002532 |
| 1661 | 4904 | -4.19675 | 0.984356 | -4.27843 | 0.002055 |
| 1662 | 4900 | -3.84336 | 0.89167  | -4.32319 | 0.001924 |
| 1663 | 4896 | -3.58508 | 0.721818 | -4.97555 | 0.000764 |
| 1664 | 4892 | -3.84717 | 0.558776 | -6.8963  | 7.10E-05 |
| 1665 | 4888 | -4.39282 | 0.659269 | -6.68316 | 9.03E-05 |
| 1666 | 4884 | -4.59881 | 0.831079 | -5.55646 | 0.000353 |
| 1667 | 4880 | -4.33895 | 0.804842 | -5.41347 | 0.000425 |
| 1668 | 4876 | -3.94457 | 0.6256   | -6.32358 | 0.000137 |
| 1669 | 4872 | -3.87607 | 0.502649 | -7.72362 | 2.93E-05 |

|      |      |          |          |          |          |
|------|------|----------|----------|----------|----------|
| 1670 | 4868 | -4.16869 | 0.500553 | -8.34497 | 1.58E-05 |
| 1671 | 4864 | -4.22449 | 0.569303 | -7.44516 | 3.91E-05 |
| 1672 | 4860 | -3.94521 | 0.586979 | -6.74759 | 8.39E-05 |
| 1673 | 4856 | -3.8677  | 0.58821  | -6.59683 | 9.96E-05 |
| 1674 | 4852 | -4.15796 | 0.613396 | -6.79475 | 7.95E-05 |
| 1675 | 4848 | -4.48085 | 0.658029 | -6.82395 | 7.70E-05 |
| 1676 | 4844 | -4.48648 | 0.715317 | -6.28614 | 0.000143 |
| 1677 | 4840 | -4.22988 | 0.705573 | -6.00863 | 0.0002   |
| 1678 | 4836 | -4.03542 | 0.643861 | -6.28056 | 0.000144 |
| 1679 | 4832 | -4.02768 | 0.616185 | -6.54936 | 0.000105 |
| 1680 | 4828 | -4.19085 | 0.661142 | -6.35372 | 0.000132 |
| 1681 | 4824 | -4.4107  | 0.774487 | -5.71107 | 0.00029  |
| 1682 | 4820 | -4.43439 | 0.762597 | -5.8287  | 0.00025  |
| 1683 | 4816 | -4.34959 | 0.613735 | -7.09703 | 5.69E-05 |
| 1684 | 4812 | -4.37871 | 0.569617 | -7.69975 | 3.00E-05 |
| 1685 | 4808 | -4.36392 | 0.728713 | -6.00567 | 0.000201 |
| 1686 | 4804 | -4.20512 | 0.850362 | -4.96115 | 0.000779 |
| 1687 | 4800 | -4.1672  | 0.825133 | -5.06268 | 0.000679 |
| 1688 | 4796 | -4.40206 | 0.787613 | -5.59964 | 0.000334 |
| 1689 | 4792 | -4.80842 | 0.79888  | -6.03269 | 0.000195 |
| 1690 | 4788 | -5.12795 | 0.818363 | -6.28517 | 0.000143 |
| 1691 | 4784 | -5.15729 | 0.802909 | -6.4452  | 0.000119 |
| 1692 | 4780 | -4.92752 | 0.696316 | -7.09785 | 5.68E-05 |
| 1693 | 4776 | -4.72492 | 0.602873 | -7.85634 | 2.56E-05 |
| 1694 | 4772 | -4.85517 | 0.633057 | -7.68951 | 3.03E-05 |
| 1695 | 4768 | -5.06309 | 0.68204  | -7.44609 | 3.91E-05 |
| 1696 | 4764 | -4.84309 | 0.735932 | -6.60191 | 9.91E-05 |
| 1697 | 4760 | -4.35227 | 0.74096  | -5.892   | 0.000231 |
| 1698 | 4756 | -4.1913  | 0.68143  | -6.16763 | 0.000165 |
| 1699 | 4752 | -4.40923 | 0.674754 | -6.55323 | 0.000105 |
| 1700 | 4748 | -4.56659 | 0.704738 | -6.50152 | 0.000111 |
| 1701 | 4744 | -4.53222 | 0.75516  | -6.02018 | 0.000198 |
| 1702 | 4740 | -4.43426 | 0.732035 | -6.07074 | 0.000186 |
| 1703 | 4736 | -4.28732 | 0.659957 | -6.50838 | 0.00011  |
| 1704 | 4732 | -4.27034 | 0.697338 | -6.13678 | 0.000171 |
| 1705 | 4728 | -4.5682  | 0.685494 | -6.68108 | 9.05E-05 |
| 1706 | 4724 | -4.88516 | 0.647347 | -7.56923 | 3.43E-05 |
| 1707 | 4720 | -4.86813 | 0.606551 | -8.05034 | 2.11E-05 |
| 1708 | 4716 | -4.6944  | 0.568685 | -8.27639 | 1.69E-05 |
| 1709 | 4712 | -4.60307 | 0.645506 | -7.149   | 5.37E-05 |
| 1710 | 4708 | -4.5674  | 0.713225 | -6.42024 | 0.000122 |

|      |      |          |          |          |          |
|------|------|----------|----------|----------|----------|
| 1711 | 4704 | -4.54606 | 0.656591 | -6.94046 | 6.76E-05 |
| 1712 | 4700 | -4.45457 | 0.587212 | -7.60482 | 3.31E-05 |
| 1713 | 4696 | -4.3282  | 0.605093 | -7.17225 | 5.24E-05 |
| 1714 | 4692 | -4.25799 | 0.688421 | -6.20139 | 0.000159 |
| 1715 | 4688 | -4.30009 | 0.743527 | -5.79538 | 0.000261 |
| 1716 | 4684 | -4.51906 | 0.735546 | -6.15368 | 0.000168 |
| 1717 | 4680 | -4.77558 | 0.739127 | -6.4725  | 0.000115 |
| 1718 | 4676 | -4.87989 | 0.771244 | -6.34167 | 0.000134 |
| 1719 | 4672 | -4.74234 | 0.737201 | -6.44891 | 0.000118 |
| 1720 | 4668 | -4.50913 | 0.696487 | -6.4893  | 0.000113 |
| 1721 | 4664 | -4.3799  | 0.609719 | -7.1991  | 5.09E-05 |
| 1722 | 4660 | -4.31505 | 0.52496  | -8.23606 | 1.75E-05 |
| 1723 | 4656 | -4.26522 | 0.484768 | -8.81447 | 1.01E-05 |
| 1724 | 4652 | -4.1647  | 0.454479 | -9.18228 | 7.24E-06 |
| 1725 | 4648 | -3.97883 | 0.533298 | -7.4806  | 3.77E-05 |
| 1726 | 4644 | -3.82246 | 0.617935 | -6.20298 | 0.000158 |
| 1727 | 4640 | -3.70226 | 0.613408 | -6.04754 | 0.000191 |
| 1728 | 4636 | -3.61217 | 0.627732 | -5.76276 | 0.000272 |
| 1729 | 4632 | -3.61837 | 0.689295 | -5.25957 | 0.000521 |
| 1730 | 4628 | -3.67325 | 0.776803 | -4.74194 | 0.001056 |
| 1731 | 4624 | -3.67559 | 0.781641 | -4.71638 | 0.001095 |
| 1732 | 4620 | -3.60466 | 0.658875 | -5.48122 | 0.00039  |
| 1733 | 4616 | -3.62192 | 0.518884 | -6.98629 | 6.42E-05 |
| 1734 | 4612 | -3.94936 | 0.445669 | -8.87672 | 9.56E-06 |
| 1735 | 4608 | -4.35894 | 0.577745 | -7.56881 | 3.44E-05 |
| 1736 | 4604 | -4.36971 | 0.709431 | -6.18388 | 0.000162 |
| 1737 | 4600 | -4.014   | 0.763929 | -5.27578 | 0.00051  |
| 1738 | 4596 | -3.76009 | 0.740374 | -5.09818 | 0.000647 |
| 1739 | 4592 | -3.8945  | 0.747116 | -5.23211 | 0.00054  |
| 1740 | 4588 | -4.04993 | 0.739557 | -5.49545 | 0.000382 |
| 1741 | 4584 | -3.76923 | 0.640476 | -5.90366 | 0.000228 |
| 1742 | 4580 | -3.30688 | 0.593675 | -5.58734 | 0.00034  |
| 1743 | 4576 | -3.2146  | 0.565452 | -5.7037  | 0.000293 |
| 1744 | 4572 | -3.49052 | 0.536949 | -6.52201 | 0.000109 |
| 1745 | 4568 | -3.75823 | 0.558415 | -6.75143 | 8.35E-05 |
| 1746 | 4564 | -3.97736 | 0.533114 | -7.48594 | 3.75E-05 |
| 1747 | 4560 | -4.1177  | 0.632596 | -6.534   | 0.000107 |
| 1748 | 4556 | -3.82256 | 0.69676  | -5.50593 | 0.000377 |
| 1749 | 4552 | -3.21169 | 0.544359 | -5.91511 | 0.000225 |
| 1750 | 4548 | -3.03481 | 0.435526 | -6.98056 | 6.46E-05 |
| 1751 | 4544 | -3.35344 | 0.458066 | -7.33566 | 4.39E-05 |

|      |      |          |          |          |          |
|------|------|----------|----------|----------|----------|
| 1752 | 4540 | -3.57758 | 0.502888 | -7.13149 | 5.48E-05 |
| 1753 | 4536 | -3.59003 | 0.441798 | -8.14773 | 1.91E-05 |
| 1754 | 4532 | -3.52409 | 0.432871 | -8.16598 | 1.88E-05 |
| 1755 | 4528 | -3.37422 | 0.562981 | -6.01515 | 0.000199 |
| 1756 | 4524 | -3.17505 | 0.648955 | -4.91151 | 0.000834 |
| 1757 | 4520 | -3.11128 | 0.638621 | -4.89156 | 0.000858 |
| 1758 | 4516 | -3.37254 | 0.672389 | -5.03821 | 0.000701 |
| 1759 | 4512 | -3.74069 | 0.756667 | -4.96572 | 0.000774 |
| 1760 | 4508 | -3.76255 | 0.770213 | -4.90351 | 0.000844 |
| 1761 | 4504 | -3.50219 | 0.687773 | -5.10697 | 0.000639 |
| 1762 | 4500 | -3.3259  | 0.608078 | -5.48654 | 0.000387 |
| 1763 | 4496 | -3.45549 | 0.62176  | -5.5809  | 0.000343 |
| 1764 | 4492 | -3.87169 | 0.70162  | -5.54222 | 0.00036  |
| 1765 | 4488 | -4.10829 | 0.637153 | -6.47099 | 0.000115 |
| 1766 | 4484 | -3.72443 | 0.56512  | -6.60925 | 9.82E-05 |
| 1767 | 4480 | -3.11136 | 0.563251 | -5.53492 | 0.000363 |
| 1768 | 4476 | -2.99304 | 0.60707  | -4.93652 | 0.000806 |
| 1769 | 4472 | -3.14067 | 0.610694 | -5.1507  | 0.000603 |
| 1770 | 4468 | -3.03638 | 0.547892 | -5.55242 | 0.000355 |
| 1771 | 4464 | -2.90805 | 0.440182 | -6.61782 | 9.73E-05 |
| 1772 | 4460 | -3.05296 | 0.542256 | -5.64168 | 0.000317 |
| 1773 | 4456 | -3.32109 | 0.729259 | -4.5645  | 0.001358 |

16  
17  
18  
19
